# Supplementary material for: Epithelial colonies in vitro elongate through collective effects
Source: eLife. 2021 Jan 4;10:e57730. doi: 10.7554/eLife.57730 (PMC7850623; doi:10.7554/eLife.57730)
Supplement: Figure 1—figure supplement 1—source data 1. [file elife-57730-fig1-figsupp1-data1.xlsx]

## Sheet: Figure 1-figure supplement 1b
Experiment #	Colony #	Cell line	Strain		Experiment #	Colony #	Cell line	Strain		Experiment #	Colony #	Cell line	Strain
1	1	MDCK	Ecadh		2	2	MDCK	Ecadh		3	3	MDCK	Ecadh
Time	Qxx(t)-Qxx(0)	Qxy(t)-Qxy(0)			Time	Qxx(t)-Qxx(0)	Qxy(t)-Qxy(0)			Time	Qxx(t)-Qxx(0)	Qxy(t)-Qxy(0)
0	0	0			0	0	0			0	0	0
10	0.00443919	-0.0042243			10	-0.00509607	-0.00513701			10	0.0011583	-0.00730289
20	0.00219953	-0.0063748			20	-0.0121776	-0.0156977			20	0.00910714	0.00144724
30	0.00321099	-0.0076405			30	-0.00539186	-0.00172849			30	0.0114375	-0.00960519
40	0.00662537	-0.0100717			40	0.00599529	0.00104435			40	0.00563392	-0.0171628
50	-0.002798	-0.0116642			50	-0.00183449	-0.00306162			50	0.0224645	1.23254e-05
60	0.00021192	-0.0134144			60	0.010016	0.000230322			60	0.0388318	-0.00718039
70	-0.0025821	-0.0139507			70	0.0137653	0.00434364			70	0.0221475	-0.00135336
80	-0.007015	-0.0105332			80	0.0168753	0.00315805			80	0.0267039	-0.00889379
90	-0.0062656	-0.0119375			90	0.0105413	0.00176625			90	0.0115622	-0.00672353
100	-0.0023381	-0.0133336			100	0.0169853	0.000308364			100	0.0125801	-0.0178699
110	-0.0062579	-0.0177764			110	0.0133433	0.0165902			110	0.025147	-0.0115456
120	-0.0039068	-0.0094252			120	0.000861362	0.0145214			120	0.0158472	-0.011729
130	-0.0105815	-0.0145064			130	0.00424231	0.0291034			130	0.0382736	0.00476283
140	-0.0032438	-0.0163181			140	0.00898338	0.0226369			140	0.0344392	0.0171519
150	-0.0056885	-0.0130837			150	0.0159271	0.0278363			150	0.0401501	0.00789421
160	-0.0086125	-0.0109967			160	0.0142173	0.0341217			160	0.0311165	0.00454468
170	-0.0011252	-0.0129716			170	0.0206706	0.0363422			170	0.0367755	0.0186904
180	-0.0010742	-0.0188749			180	0.0164718	0.0350529			180	0.0419069	0.0397532
190	0.00090584	-0.0188453			190	0.0220143	0.0408494			190	0.0724147	0.0565004
200	-0.0051889	-0.0204429			200	0.0161096	0.0426675			200	0.071306	0.0315313
210	-0.0059048	-0.0167351			210	0.0197151	0.0322961			210	0.0914864	0.0488597
220	-0.00359	-0.0115034			220	0.0202942	0.035862			220	0.0697092	0.0666079
230	-0.002169	-0.01618			230	0.00854105	0.0333238			230	0.0356147	0.0568406
240	-0.0056944	-0.0162602			240	0.0108367	0.0276935			240	0.0372092	0.0608728
250	0.00090835	-0.011656			250	0.0104455	0.0355938			250	0.0318584	0.0606809
260	-0.0026771	-0.0037005			260	0.0127608	0.0399674			260	0.0221582	0.0704262
270	-0.0013668	-0.0088294			270	0.0177777	0.0346897			270	0.0279905	0.0696277
280	-0.0004453	-0.0082902			280	0.0162781	0.0402684			280	0.0297212	0.0742136
290	-0.003282	-0.0103688			290	0.0121196	0.0363821			290	0.0282876	0.0738041
300	-0.0016061	-0.0084001			300	0.0112372	0.031496			300	0.0276434	0.083062
310	-0.0016649	-0.01435			310	0.0134059	0.0288296			310	0.0367486	0.0690525
320	-0.0113253	-0.0135192			320	0.0200141	0.0330927			320	0.0359923	0.0773699
330	-0.0025648	-0.018722			330	0.0181425	0.0291312			330	0.0414872	0.0755136
340	-0.0006754	-0.0200792			340	0.0209295	0.0333497			340	0.050327	0.0598843
350	-0.0053197	-0.0254614			350	0.0226774	0.0380061			350	0.0469135	0.0676905
360	-0.006305	-0.0280814			360	0.0224076	0.0401677			360	0.0525577	0.0731276
