# Supplementary material for: Epithelial colonies in vitro elongate through collective effects
Source: eLife. 2021 Jan 4;10:e57730. doi: 10.7554/eLife.57730 (PMC7850623; doi:10.7554/eLife.57730)
Supplement: Figure 1—figure supplement 2—source data 1. [file elife-57730-fig1-figsupp2-data1.xlsx]

## Sheet: Figure 1-figure supplement 2c
Experiment #	Colony #	Cell line	Strain		Experiment #	Colony #	Cell line	Strain		Experiment #	Colony #	Cell line	Strain		Experiment #	Colony #	Cell line	Strain		Experiment #	Colony #	Cell line	Strain		Experiment #	Colony #	Cell line	Strain
1	1	Caco2	WT		2	2	Caco2	WT		2	3	Caco2	WT		3	4	Caco2	WT		3	5	Caco2	WT		3	6	Caco2	WT
Time (min)	Qxx(t)-Qxx(0)	Qxy(t)-Qxy(0)			Time (min)	Qxx(t)-Qxx(0)	Qxy(t)-Qxy(0)			Time (min)	Qxx(t)-Qxx(0)	Qxy(t)-Qxy(0)			Time (min)	Qxx(t)-Qxx(0)	Qxy(t)-Qxy(0)			Time (min)	Qxx(t)-Qxx(0)	Qxy(t)-Qxy(0)			Time (min)	Qxx(t)-Qxx(0)	Qxy(t)-Qxy(0)
0	0	0			0	0	0			0	0	0			0	0	0			0	0	0			0	0	0
10	0.0465139	0.0452036			10	0.00863104	-0.00837968			10	0.0160252	-0.00664416			10	0.0240894	0.0309262			10	0.0173873	-0.00440496			10	0.00225282	-0.000920958
20	-0.000731869	0.0190761			20	0.00704795	-0.0110344			20	0.0154722	0.00346076			20	0.00447488	0.000523758			20	0.0453746	0.00343808			20	0.000754984	0.00510589
30	0.0156097	0.00826167			30	0.00491555	-0.0128662			30	0.0249145	-0.00442337			30	0.00947939	0.018748			30	0.0557755	-0.0140207			30	0.0054319	0.0105242
40	0.0276776	-0.046011			40	0.0122507	-0.00466999			40	0.0354973	0.0122412			40	0.0006021	-0.00960753			40	0.0310431	-0.0163071			40	0.00596275	0.0144422
50	0.0334609	-0.0259602			50	0.0070806	-0.010483			50	0.0345394	0.00180819			50	0.0100299	-0.0326767			50	0.0488646	-0.0191552			50	0.0292831	0.00361737
60	0.0118557	-0.0209796			60	0.00575004	-0.0195651			60	0.0346815	0.00466185			60	0.0169147	-0.0261911			60	0.0428959	0.00358507			60	-0.00216752	0.00961234
70	0.0473047	-0.0230443			70	0.00110987	-0.0148173			70	0.0484425	0.00630855			70	0.00419371	-0.0176185			70	0.0553155	0.00363923			70	0.0158005	0.00337638
80	0.0423796	0.003774			80	0.00221726	-0.0137655			80	0.0359866	0.00820499			80	0.00492864	-0.0161959			80	0.0375107	0.010588			80	0.0127025	-0.0204724
90	0.0560598	-0.000876613			90	0.000667579	-0.0130374			90	0.0425029	0.0188261			90	0.0155471	0.00566422			90	0.0434999	-0.000134478			90	0.00492143	-0.0184824
100	0.0488091	-0.0125831			100	0.00402164	-0.0194254			100	0.0347328	0.0225784			100	0.0174707	-0.0132241			100	0.0440969	-0.00252286			100	0.0514407	-0.0225835
110	0.0687004	0.00311318			110	0.00321238	-0.015109			110	0.0302621	0.0226123			110	0.0298151	0.00102943			110	0.0434579	0.00275274			110	0.0223157	-0.0038349
120	0.06744	-0.000949227			120	0.0141567	-0.00812059			120	0.046693	0.0340608			120	0.00690023	-0.00288826			120	0.0500254	0.012758			120	0.0152962	-0.00195458
130	0.0829988	0.0107567			130	0.026174	-0.0147244			130	0.0405894	0.0267296			130	0.0156475	-0.00115562			130	0.0532445	0.00366174			130	0.0161694	-0.0127559
140	0.0803352	-0.00515217			140	0.0322862	-0.0150961			140	0.042791	0.0152378			140	0.00238922	-0.00864923			140	0.0588294	-0.0192581			140	0.00668444	-0.00683818
150	0.0717156	-0.0154799			150	0.0310924	-0.0238829			150	0.0448425	0.0232823			150	0.0272683	-0.0120689			150	0.055389	-0.000875986			150	0.0136396	0.00308206
160	0.0754362	-0.0237632			160	0.0368387	-0.020259			160	0.0446045	0.0154501			160	0.0191352	-0.0101481			160	0.075721	-0.00222881			160	0.0366006	-0.0176168
170	0.0838749	-0.0295596			170	0.0547403	-0.0332496			170	0.0500895	0.0213319			170	0.0225536	0.00301927			170	0.0611504	0.0228613			170	0.0188715	-0.00906916
180	0.112752	-0.0370834			180	0.0725107	-0.028907			180	0.0467157	0.0218667			180	0.012044	-0.0146815			180	0.0637151	0.0154666			180	0.0138758	-0.0174493
190	0.120454	-0.0321218			190	0.0743656	-0.0422868			190	0.0490871	0.0228695			190	0.030269	-0.00272515			190	0.0646008	0.00321423			190	0.0117952	-0.0271254
200	0.110861	-0.0388051			200	0.0800197	-0.0336648			200	0.0444373	0.0234587			200	0.0292352	-0.0015831			200	0.0741904	0.0138066			200	0.0221424	-0.0238094
210	0.126513	-0.0519246			210	0.0882111	-0.0395835			210	0.0541458	0.0246846			210	0.0325889	0.0188061			210	0.0715424	-0.0101994			210	0.0209347	-0.0380006
220	0.143741	-0.046261			220	0.0876214	-0.0366627			220	0.0419267	0.0229707			220	0.0353153	0.0283196			220	0.0696958	-0.013823			220	0.0220219	-0.022142
230	0.160264	-0.0372176			230	0.0914076	-0.0387352			230	0.0433165	0.0176295			230	0.0212747	0.00787916			230	0.0855191	0.0217341			230	0.0243694	-0.0267832
240	0.161291	-0.0230653			240	0.0877869	-0.0396443			240	0.0531248	0.00404314			240	0.0070751	0.0274055			240	0.102334	0.00947707			240	0.0135788	-0.0327135
250	0.178589	-0.0172308			250	0.0904911	-0.041922			250	0.0448674	0.00811093			250	0.0246859	0.034526			250	0.0955767	0.000743697			250	0.0323706	-0.0161675
260	0.166232	-0.0203565			260	0.091076	-0.0372424			260	0.0438945	0.00903441			260	0.0150545	0.0124518			260	0.114123	-0.00632663			260	0.028398	-0.010128
270	0.183517	-0.0345753			270	0.107301	-0.0344603			270	0.0480649	0.0165003			270	0.048579	0.0160746			270	0.102027	0.0197162			270	0.0571384	-0.0322735
280	0.181527	-0.0134561			280	0.112663	-0.0389334			280	0.0399079	0.0101484			280	0.0401143	0.0183771			280	0.111026	0.00286305			280	0.0328977	-0.00809056
290	0.20339	-0.00528889			290	0.113396	-0.0344679			290	0.0308094	0.0110653			290	0.0549399	0.0149659			290	0.10027	0.0175932			290	0.0525622	-0.0441757
300	0.202224	-0.0173014			300	0.11349	-0.0341901			300	0.0192213	0.00731852			300	0.0573422	0.034984			300	0.102627	0.0206765			300	0.0530012	-0.0372144
310	0.187241	-0.0108034			310	0.118334	-0.0317886			310	0.0284191	0.00271709			310	0.050044	0.0182297			310	0.10533	0.0126879			310	0.0568082	-0.0209472
320	0.211775	-0.00181375			320	0.123681	-0.0321307			320	0.0200857	0.00679126			320	0.0655512	-0.00854863			320	0.139115	-0.0151491			320	0.0814412	-0.0404662
330	0.186569	-0.0231834			330	0.115969	-0.032324			330	0.0235326	0.00110515			330	0.0643188	0.0322074			330	0.118797	0.0035357			330	0.0699901	-0.0326755
340	0.232103	-0.00853754			340	0.122842	-0.0260535			340	0.0268886	0.000166008			340	0.0546729	0.0234478			340	0.126497	0.00648462			340	0.10245	-0.0296627
350	0.205809	0.0347018			350	0.123076	-0.0204923			350	0.0105757	0.0028304			350	0.0808592	0.00729587			350	0.122703	-0.0169			350	0.0878535	-0.00450542
360	0.243544	0.0228725			360	0.127801	-0.0305159			360	0.0125663	0.00155519			360	0.0956023	-0.00175188			360	0.118614	-0.0105383			360	0.0713364	-0.0228363

## Sheet: Figure 1-figure supplement 2d
Experiment #	Colony #	Cell line	Strain		Experiment #	Colony #	Cell line	Strain		Experiment #	Colony #	Cell line	Strain		Experiment #	Colony #	Cell line	Strain		Experiment #	Colony #	Cell line	Strain		Experiment #	Colony #	Cell line	Strain		Experiment #	Colony #	Cell line	Strain		Experiment #	Colony #	Cell line	Strain		Experiment #	Colony #	Cell line	Strain		Experiment #	Colony #	Cell line	Strain
1	1	MCF10A	WT		1	2	MCF10A	WT		1	3	MCF10A	WT		1	4	MCF10A	WT		1	5	MCF10A	WT		2	6	MCF10A	WT		2	7	MCF10A	WT		3	8	MCF10A	WT		3	9	MCF10A	WT		3	10	MCF10A	WT
Time (min)	Qxx(t)-Qxx(0)	Qxy(t)-Qxy(0)			Time (min)	Qxx(t)-Qxx(0)	Qxy(t)-Qxy(0)			Time (min)	Qxx(t)-Qxx(0)	Qxy(t)-Qxy(0)			Time (min)	Qxx(t)-Qxx(0)	Qxy(t)-Qxy(0)			Time (min)	Qxx(t)-Qxx(0)	Qxy(t)-Qxy(0)			Time (min)	Qxx(t)-Qxx(0)	Qxy(t)-Qxy(0)			Time (min)	Qxx(t)-Qxx(0)	Qxy(t)-Qxy(0)			Time (min)	Qxx(t)-Qxx(0)	Qxy(t)-Qxy(0)			Time (min)	Qxx(t)-Qxx(0)	Qxy(t)-Qxy(0)			Time (min)	Qxx(t)-Qxx(0)	Qxy(t)-Qxy(0)
0	0	0			0	0	0			0	0	0			0	0	0			0	0	0			0					0					0	0	0			0	0	0			0	0	0
10	0.00523536	-0.00246328			10	0.00174052	0.0185163			10	0.0117741	-0.0257973			10	0.00265721	0.0033601			10	0.00978312	0.00568483			10					10					10	-0.00417501	-0.00443198			10	-0.00012385	0.00260534			10	0.0173437	0.00181504
20	0.0282343	0.00179802			20	0.0137663	0.00606437			20	0.0404185	-0.0234369			20	0.0249582	0.0155915			20	0.00788798	0.00978046			20					20					20	-0.00535513	-0.00149273			20	0.00582424	-0.00121773			20	0.0222435	-0.00568585
30	0.0539471	0.00108243			30	0.0112361	0.0135448			30	0.0185309	-0.00889102			30	0.0168552	0.00158095			30	0.00210561	0.014036			30					30					30	0.00343382	0.00715836			30	-0.00362125	-0.0139544			30	0.00843071	-0.000971115
40	0.0753145	-0.0163453			40	0.000661233	-0.00270755			40	0.0208159	-0.0394833			40	0.0342665	0.00755538			40	0.0130219	0.00443599			40					40					40	-0.00631487	0.00447209			40	0.0109421	-0.0169107			40	0.0261664	0.000297121
50	0.0702528	-0.0544136			50	-0.00214887	0.00222393			50	0.0199189	-0.0284056			50	0.0421897	0.00529636			50	0.00681384	-0.0106236			50	0	0			50	0	0			50	0.0172659	0.0120794			50	0.00934936	-0.00176373			50	0.0152893	-0.00104149
60	0.104153	-0.0595047			60	-0.00386949	-0.00574809			60	-0.00945263	-0.00346399			60	0.0571178	-0.00597055			60	0.00556593	-0.00581837			60	0.0204881	0.00148942			60	0.00187661	-0.00776331			60	0.00719568	0.000138123			60	0.00816511	-0.0148318			60	0.0235887	-0.00771941
70	0.103372	-0.0755639			70	0.000983992	0.00399335			70	0.0213554	0.00118498			70	0.0568623	-0.00896768			70	0.0109326	-0.0179196			70	-0.0147308	-0.0139952			70	0.0238401	-0.0098886			70	0.00441103	-0.00725517			70	0.0212979	-0.00590299			70	0.0195033	-0.00584997
80	0.10794	-0.0876573			80	-0.00294419	-0.0130377			80	0.021937	-0.00880176			80	0.0689693	-0.00631694			80	0.017558	-0.0175805			80	-0.000642211	0.00799948			80	0.0203646	-0.0219227			80	0.0113835	-0.00681045			80	0.0183705	-0.00768998			80	0.0274427	-0.0089414
90	0.133632	-0.10593			90	0.000518271	-0.0127573			90	0.00903924	0.00285355			90	0.0593201	-0.00134656			90	0.0202009	-0.0125985			90	0.00190558	0.0144997			90	0.0211658	-0.0128305			90	0.00252278	0.000696341			90	0.0132508	0.000996639			90	0.031213	-0.00715812
100	0.126413	-0.0876796			100	-0.0247684	-0.00494705			100	0.0158817	-0.0325357			100	0.0709028	0.00706285			100	0.0255221	-0.0338123			100	-0.0135074	-0.0258492			100	0.034879	-0.0161061			100	0.0127441	-0.0125072			100	0.0173671	-0.000154461			100	0.0390549	-0.00421215
110	0.15212	-0.113581			110	-0.0264913	-0.0129657			110	0.0258635	-0.00790642			110	0.0604479	-0.00869145			110	0.0363682	-0.0130378			110	0.0035266	-0.0139637			110	0.0496431	-0.0408004			110	0.0237124	-0.0196713			110	0.0214978	0.000110706			110	0.0287572	0.00372955
120	0.171564	-0.121116			120	-0.0116841	0.00504423			120	0.00799613	0.0208374			120	0.0704752	-0.00218861			120	0.0249265	-0.00428765			120	-0.00941186	-0.0243164			120	0.0583638	-0.040836			120	0.0206632	-0.0220761			120	0.0231608	-0.00476199			120	0.0324784	0.00101285
130	0.216436	-0.080522			130	-0.0119263	0.00397419			130	0.00497109	-0.00678006			130	0.0690442	0.0103147			130	0.0230483	-0.00752547			130	-0.00614633	-0.0252288			130	0.0751814	-0.0493554			130	0.0209375	-0.0226795			130	0.0244278	0.00333881			130	0.0427211	-0.00342207
140	0.177943	-0.0632721			140	-0.0064672	-0.00756456			140	0.0163021	-0.0125276			140	0.0567864	0.00496062			140	0.0174217	-0.00863112			140	-0.0150174	-0.0178724			140	0.0786063	-0.0438954			140	0.0267268	-0.0306727			140	0.0283944	0.000223361			140	0.0456885	0.0043946
150	0.178341	-0.0488365			150	-0.0259867	-0.00324008			150	-0.00479589	-0.0152288			150	0.0583691	0.0134863			150	0.0309543	-0.00973149			150	-0.00030109	-0.000872845			150	0.0750081	-0.0441203			150	0.0407296	-0.036161			150	0.0325281	0.00796624			150	0.0469504	0.00313019
160	0.114055	-0.0659366			160	-0.0154601	-0.00979484			160	-0.0114052	-0.0151912			160	0.0734136	0.00783737			160	0.019154	-0.0248648			160	0.00241048	-0.013589			160	0.0838945	-0.0353822			160	0.0498164	-0.0273918			160	0.0367849	0.00221578			160	0.0618207	0.000719485
170	0.0989565	-0.101093			170	-0.0271234	-0.00554962			170	-0.015272	-0.00656909			170	0.0751412	0.0141416			170	0.0234452	-0.0138847			170	-0.0149243	-0.0209951			170	0.0830528	-0.0408017			170	0.0487522	-0.0260769			170	0.0365326	0.00709695			170	0.0534752	0.0173958
180	0.113298	-0.125311			180	-0.0189679	-0.010119			180	-0.0119813	-0.0377174			180	0.0668418	0.0114638			180	0.0325182	-0.0107236			180	0.0122242	-0.0300181			180	0.0956511	-0.0363414			180	0.059804	-0.0360179			180	0.0413643	0.0220287			180	0.0580867	0.0135206
190	0.120533	-0.0787334			190	-0.0303289	-0.0247065			190	0.0130332	-0.0183423			190	0.0814625	0.0257135			190	0.0213625	-0.00446919			190	0.0162644	-0.0231021			190	0.104288	-0.0323412			190	0.0541367	-0.0381927			190	0.0390786	0.0186616			190	0.0476515	0.00671835
200	0.114093	-0.0788734			200	-0.0102053	-0.0207451			200	0.0316494	-0.0200122			200	0.0715993	0.01568			200	0.0230774	-0.0255955			200	-0.0155802	-0.0281624			200	0.0967475	-0.0198627			200	0.053988	-0.0395638			200	0.0537347	0.00867449			200	0.0524003	0.00937603
210	0.135449	-0.114703			210	-0.00878812	-0.0336618			210	0.030913	-0.0498735			210	0.0732727	0.0230239			210	0.0202365	0.000441688			210	0.0154748	0.00210844			210	0.107571	-0.0244733			210	0.0580349	-0.0420857			210	0.058536	0.0150628			210	0.0610002	0.0216846
220	0.123018	-0.148722			220	-0.00369981	-0.023048			220	0.0287658	-0.0379104			220	0.0743514	0.0204694			220	0.0223165	-0.00962831			220	0.0123509	-0.0222348			220	0.120472	-0.0181863			220	0.0549244	-0.055069			220	0.054951	0.0114608			220	0.061134	0.0245472
230	0.168938	-0.130109			230	0.00232846	-0.0182726			230	0.0226565	-0.0598238			230	0.0719784	-0.00345692			230	0.0290032	-0.00264853			230	0.0156969	-0.0229404			230	0.126685	-0.0314414			230	0.0615217	-0.0649338			230	0.0495858	0.00394381			230	0.0680587	0.0219272
240	0.143181	-0.113897			240	0.00400707	-0.0309135			240	0.0098797	-0.0753811			240	0.0675706	-0.00447879			240	0.0340845	-0.0199125			240	0.0133169	-0.0214527			240	0.125999	-0.0283434			240	0.0630942	-0.0627844			240	0.0575142	0.0123483			240	0.0847235	0.0212355
250	0.161191	-0.118561			250	0.00325815	-0.0379377			250	0.0234417	-0.0631861			250	0.0658241	0.0129255			250	0.0248235	-0.013822			250	0.023896	-0.0286097			250	0.111186	-0.0248002			250	0.0496418	-0.0635586			250	0.0556326	0.0200597			250	0.0824341	0.0175502
260	0.147752	-0.0923305			260	0.00525837	-0.0381511			260	0.0591788	-0.0481243			260	0.0585462	0.0106776			260	0.0488005	-0.0196869			260	0.0397275	-0.0157155			260	0.121079	-0.0234768			260	0.0507065	-0.0697037			260	0.0592164	0.020278			260	0.0966852	0.00953152
270	0.10804	-0.0832058			270	0.0334841	-0.0444986			270	0.0488904	-0.0626735			270	0.067316	0.0244605			270	0.0552812	-0.0103847			270	0.0318	-0.0211888			270	0.132081	-0.0272436			270	0.0483148	-0.0704268			270	0.0602799	0.0248296			270	0.0943841	0.0199403
280	0.116705	-0.040174			280	0.0264448	-0.0377145			280	0.0510347	-0.0722944			280	0.0756616	0.022038			280	0.0581511	0.000609909			280	0.0493582	-0.0292289			280	0.131641	-0.0185534			280	0.0458707	-0.0601454			280	0.0662936	0.0229372			280	0.114516	0.0102126
290	0.109607	-0.0427956			290	0.0477382	-0.0359626			290	0.0329847	-0.0747768			290	0.0786482	0.0222888			290	0.0574655	-0.00429519			290	0.0461158	-0.0269691			290	0.128894	-0.0247801			290	0.0463949	-0.0536527			290	0.0586074	0.00694203			290	0.112425	0.0163068
300	0.126984	-0.0531002			300	0.00346896	-0.0313306			300	0.0458618	-0.0802793			300	0.0739326	0.00756796			300	0.0507473	-0.000129415			300	0.0537741	-0.0230399			300	0.130832	-0.0287046			300	0.050977	-0.0540534			300	0.0576086	0.0101755			300	0.106922	0.0132405
310	0.116547	-0.00629724			310	0.012173	-0.0117325			310	0.0416489	-0.0813113			310	0.069022	0.012705			310	0.0419979	0.00430278			310	0.0547639	-0.0282291			310	0.142312	-0.0236275			310	0.0455792	-0.0594721			310	0.0571147	0.00310571			310	0.127442	0.0216688
320	0.133737	0.00372014			320	-0.00307825	-0.0171966			320	0.0554081	-0.0784619			320	0.0659299	0.00573656			320	0.051145	0.00398634			320	0.0658562	-0.0201363			320	0.139009	-0.0238154			320	0.0290595	-0.0515544			320	0.0646047	0.0120848			320	0.139754	0.010622
330	0.191025	-0.0583168			330	0.0055392	-0.0292323			330	0.0601701	-0.0626592			330	0.0627897	-0.000612348			330	0.0361724	0.0041346			330	0.0800806	-0.0242488			330	0.141572	-0.0216514			330	0.0185427	-0.0482466			330	0.0584288	0.0185831			330	0.130438	0.00676985
340	0.197498	-0.0182372			340	-0.00212295	-0.0359494			340	0.051265	-0.0662421			340	0.0693712	0.00993533			340	0.041401	-0.00156262			340	0.0940268	-0.0168371			340	0.138329	-0.0166227			340	0.0248768	-0.0232567			340	0.0704202	0.02226			340	0.12318	-0.00484003
350	0.207714	-0.0331924			350	0.0115187	-0.0290854			350	0.0339315	-0.0560003			350	0.0656592	-0.000393075			350	0.050977	-0.0010342			350	0.0957989	-0.0135453			350	0.136275	-0.0126017			350	0.0375051	-0.0427336			350	0.071433	0.0135659			350	0.135788	0.00122354
360	0.217689	-0.0171391			360	0.0289506	0.00562183			360	0.0400092	-0.0447173			360	0.0645412	0.00338416			360	0.0547884	0.0075811			360	0.100551	-0.011179			360	0.13602	-0.0124142			360	0.0542536	-0.0322581			360	0.0681656	0.00659912			360	0.127921	0.000983229
