# Supplementary material for: Epithelial colonies in vitro elongate through collective effects
Source: eLife. 2021 Jan 4;10:e57730. doi: 10.7554/eLife.57730 (PMC7850623; doi:10.7554/eLife.57730)
Supplement: Figure 1—source data 1. [file elife-57730-fig1-data1.xlsx]

## Sheet: Figure 1e
Experiment #	Colony #	Cell line	Strain		Experiment #	Colony #	Cell line	Strain		Experiment #	Colony #	Cell line	Strain		Experiment #	Colony #	Cell line	Strain
1	1	MDCK	Ecadh		2	2	MDCK	Ecadh		3	3	MDCK	Ecadh		4	4	MDCK	Ecadh
Time	Qxx(t)-Qxx(0)	Qxy(t)-Qxy(0)			Time	Qxx(t)-Qxx(0)	Qxy(t)-Qxy(0)			Time	Qxx(t)-Qxx(0)	Qxy(t)-Qxy(0)			Time	Qxx(t)-Qxx(0)	Qxy(t)-Qxy(0)
0					0					0					0
10	0.00581836	-0.0203794			10	0.00230938	0.00278047			10	0.00619455	0.000414197			10	-0.0228722	-0.00227538
20	-0.00230836	-0.0237287			20	-0.00780854	-0.00256601			20	0.0148363	0.000588775			20	-0.00634912	-0.00746858
30	0.0020656	-0.017111			30	-0.0173866	-0.00807099			30	0.00483794	0.000986519			30	0.000376801	-0.00331457
40	0.0100701	-0.00070249			40	-0.017988	-0.00257363			40	0.00189173	0.00761451			40	-0.001616	-0.00653445
50	0.0144804	-0.00089413			50	-0.0276547	-0.00684169			50	0.0139234	0.00623652			50	2.23501e-05	-0.0199697
60	0.0150343	-0.0108079			60	-0.0170958	-0.0111598			60	0.0225918	0.00766934			60	0.00682909	-0.0277311
70	0.0103763	0.00138892			70	-0.000661276	-0.00772973			70	0.0184117	0.0138119			70	0.0170982	-0.029073
80	0.00647374	-0.00231942			80	0.000701436	0.00542214			80	0.0457722	-0.00468307			80	0.00551192	-0.0245831
90	0.0118304	0.005371			90	-0.000169806	0.00172745			90	0.0459969	0.0117322			90	0.0322294	-0.0445552
100	0.0198229	0.00385602			100	-0.00163331	0.0143553			100	0.040131	0.00379677			100	0.0289472	-0.0327181
110	0.0377401	0.00467811			110	-0.00080756	0.0203589			110	0.0446124	0.0105686			110	0.0298927	-0.043476
120	0.0483556	-0.000925867			120	0.00135766	0.0245725			120	0.0287393	0.0231852			120	0.0234508	-0.0340209
130	0.0407932	0.00416869			130	0.00411223	0.0314805			130	0.0518401	0.011862			130	0.0254222	-0.0439441
140	0.0436602	0.00763011			140	0.00658481	0.0238538			140	0.0675597	0.0106419			140	0.0255279	-0.024881
150	0.0523166	0.0081579			150	0.00720814	0.0210889			150	0.080904	0.00232629			150	0.0334686	-0.0393208
160	0.0548416	0.0134644			160	0.0102567	0.0233848			160	0.0829139	0.00406762			160	0.0253646	-0.0319388
170	0.0679318	0.00584723			170	0.0224191	0.02326			170	0.0834275	0.00971053			170	0.0301367	-0.0361994
180	0.0733389	0.0303997			180	0.0201899	0.0159903			180	0.0996655	0.0162869			180	0.032823	-0.0411265
190	0.0474884	0.0377347			190	0.0327666	0.0150973			190	0.0948876	0.0132635			190	0.0334661	-0.0367052
200	0.0649694	0.039597			200	0.0322668	0.0205566			200	0.102662	0.00489639			200	0.0366942	-0.0527171
210	0.0509329	0.0373381			210	0.0220249	0.0103223			210	0.104852	0.0134033			210	0.0492068	-0.0602532
220	0.032463	0.0310966			220	0.0370129	0.0197396			220	0.119099	0.0092381			220	0.0487913	-0.07031
230	0.0287333	0.0188911			230	0.0251582	0.0156897			230	0.137647	0.0102849			230	0.0493624	-0.0769835
240	0.0283041	0.00826514			240	0.0231728	0.0120386			240	0.151015	0.00920054			240	0.0566979	-0.0856361
250	0.0325078	0.0160949			250	0.00973682	0.00171227			250	0.160039	0.0130978			250	0.065204	-0.0784424
260	0.0366856	-0.00255511			260	0.00978812	-0.00101956			260	0.151703	0.00840694			260	0.0719588	-0.0701069
270	0.0299891	-0.0119753			270	0.00984863	-0.00738567			270	0.167015	-0.000597508			270	0.0679161	-0.0570977
280	0.0260307	-0.0122783			280	0.00297886	-0.011328			280	0.173835	0.00887722			280	0.0651037	-0.0571564
290	0.0306931	-0.00829689			290	0.00189834	-0.00392382			290	0.20438	0.00453778			290	0.082134	-0.0537035
300	0.0345028	-0.0044056			300	0.00215963	-0.012291			300	0.200508	0.000130813			300	0.086369	-0.057841
310	0.0351859	-0.00359255			310	0.00586709	-0.0107775			310	0.219134	-0.00575481			310	0.0923967	-0.0471385
320	0.035225	-0.00439805			320	-0.0020456	-0.0057987			320	0.223421	-0.0113005			320	0.0900096	-0.0475207
330	0.0522998	-0.00752725			330	-0.00188528	-0.00781092			330	0.227151	-0.011684			330	0.0873526	-0.0370687
340	0.0412341	-0.00885418			340	-0.00425755	-0.0157067			340	0.233559	-0.0235497			340	0.0788636	-0.0397125
350	0.0458708	-0.0045332			350	-0.000269604	-0.0178872			350	0.230689	0.00351343			350	0.0895149	-0.0342656
360	0.0499389	-0.0055332			360	0.00483973	-0.0124404			360	0.225848	-0.00719768			360	0.0979843	-0.0204746

## Sheet: Figure 1f
Experiment #	Colony #	Cell line	Strain		Experiment #	Colony #	Cell line	Strain		Experiment #	Colony #	Cell line	Strain		Experiment #	Colony #	Cell line	Strain
1	1	MDCK	Ecadh		2	2	MDCK	Ecadh		3	3	MDCK	Ecadh		4	4	MDCK	Ecadh
Time	cos2deltatheta				Time	cos2deltatheta				Time	cos2deltatheta				Time	cos2deltatheta
0	-0.961492				0	0.894825				0	0.972174				0	-0.727438
10	-0.673838				10	0.873007				10	0.978444				10	-0.925818
20	-0.765775				20	0.866339				20	0.985169				20	-0.90725
30	-0.830946				30	0.865501				30	0.973307				30	-0.779141
40	-0.887172				40	0.575776				40	0.906293				40	-0.858352
50	-0.724581				50	-0.43677				50	0.956029				50	-0.999729
60	-0.633921				60	0.986923				60	0.962113				60	-0.898779
70	-0.792055				70	0.981687				70	0.916949				70	-0.472335
80	-0.97027				80	0.820491				80	0.999448				80	-0.969291
90	-0.568102				90	0.868008				90	0.970253				90	0.400445
100	0.0494773				100	0.656217				100	0.98789				100	0.509071
110	0.874179				110	0.592576				110	0.972711				110	0.33532
120	0.987612				120	0.579139				120	0.887799				120	0.127757
130	0.911029				130	0.551646				130	0.973857				130	0.1564
140	0.8793				140	0.655716				140	0.983647				140	0.655242
150	0.923492				150	0.692042				150	0.996324				150	0.529475
160	0.8816				160	0.700785				160	0.995049				160	0.304033
170	0.973635				170	0.798509				170	0.989047				170	0.47252
180	0.832438				180	0.846082				180	0.98396				180	0.473996
190	0.545078				190	0.902495				190	0.986816				190	0.58674
200	0.710849				200	0.866217				200	0.995862				200	0.421542
210	0.593025				210	0.899863				210	0.98851				210	0.568677
220	0.336865				220	0.887413				220	0.993969				220	0.477527
230	0.358368				230	0.871933				230	0.994598				230	0.439594
240	0.544024				240	0.89126				240	0.995916				240	0.473104
250	0.519519				250	0.925844				250	0.994338				250	0.600197
260	0.98555				260	0.949939				260	0.996327				260	0.711487
270	0.855238				270	0.989606				270	0.999439				270	0.783715
280	0.703295				280	0.999207				280	0.996901				280	0.763728
290	0.971541				290	0.953148				290	0.998747				290	0.876256
300	0.99724				300	0.999985				300	0.999494				300	0.865833
310	0.992567				310	0.998546				310	0.999983				310	0.935654
320	0.997451				320	0.960391				320	0.999869				320	0.929764
330	0.998173				330	0.980423				330	0.999848				330	0.969505
340	0.988673				340	0.987754				340	0.998079				340	0.947757
350	0.999289				350	0.976477				350	0.999156				350	0.979939
360	1				360	1				360	1				360	1
