# Supplementary material for: Epithelial colonies in vitro elongate through collective effects
Source: eLife. 2021 Jan 4;10:e57730. doi: 10.7554/eLife.57730 (PMC7850623; doi:10.7554/eLife.57730)
Supplement: Figure 2—figure supplement 1—source data 1. [file elife-57730-fig2-figsupp1-data1.xlsx]

## Sheet: Figure 2-figure supplement 1
Stretching	0.05	120s
Experiment #	Colony #	Cell line	Strain		Experiment #	Colony #	Cell line	Strain		Experiment #	Colony #	Cell line	Strain		Experiment #	Colony #	Cell line	Strain		Experiment #	Colony #	Cell line	Strain		Experiment #	Colony #	Cell line	Strain
1	1	MDCK	Ecadh		2	2	MDCK	Ecadh		3	3	MDCK	Ecadh		3	4	MDCK	Ecadh		4	5	MDCK	Ecadh		5	6	MDCK	Ecadh
Time (min)	Qxx(t)-Qxx(0)	Qxy(t)-Qxy(0)			Time (min)	Qxx(t)-Qxx(0)	Qxy(t)-Qxy(0)			Time (min)	Qxx(t)-Qxx(0)	Qxy(t)-Qxy(0)			Time (min)	Qxx(t)-Qxx(0)	Qxy(t)-Qxy(0)			Time (min)	Qxx(t)-Qxx(0)	Qxy(t)-Qxy(0)			Time (min)	Qxx(t)-Qxx(0)	Qxy(t)-Qxy(0)
0					0					0					0					0					0
30	0.0372364	-0.000696411			30	0.0202527	-0.00187134			30	-0.0105162	0.00417973			30	-0.00888758	0.00364331			30	-0.0114648	0.00692198			30	-0.0334854	0.0189595
60	0.0917526	-0.00873742			60	0.0270177	-0.0201357			60	-0.0416277	-0.00963781			60	-0.0175578	0.019768			60	-0.0108705	0.00109025			60	-0.0491628	0.0245939
90	0.112398	0.00139446			90	0.0376647	-0.0139405			90	-0.0529354	-0.0225708			90	-0.0325302	0.0313976			90	0.0161914	0.0181675			90	-0.0695655	0.0361361
120	0.135545	0.0049244			120	0.0420445	-0.0426965			120	-0.0645763	-0.025491			120	-0.0178015	0.0235057			120	0.0170173	0.0145431			120	-0.0582811	0.0456691
Stretching	0.05	20s
Experiment #	Colony #	Cell line	Strain		Experiment #	Colony #	Cell line	Strain		Experiment #	Colony #	Cell line	Strain		Experiment #	Colony #	Cell line	Strain		Experiment #	Colony #	Cell line	Strain
1	1	MDCK	Ecadh		2	2	MDCK	Ecadh		3	3	MDCK	Ecadh		3	4	MDCK	Ecadh		3	5	MDCK	Ecadh
Time (min)	Qxx(t)-Qxx(0)	Qxy(t)-Qxy(0)			Time (min)	Qxx(t)-Qxx(0)	Qxy(t)-Qxy(0)			Time (min)	Qxx(t)-Qxx(0)	Qxy(t)-Qxy(0)			Time (min)	Qxx(t)-Qxx(0)	Qxy(t)-Qxy(0)			Time (min)	Qxx(t)-Qxx(0)	Qxy(t)-Qxy(0)
0					0					0					0					0
30	0.0696667	0.00285865			30	-0.0180551	0.0139352			30	0.0126565	-0.0500777			30	-0.00848899	-0.0118062			30	0.0145802	0.0127348
60	0.115989	-0.0124119			60	-0.0458233	0.0129392			60	0.0136124	0.0126942			60	-0.0282674	-0.0202276			60	0.0298682	0.0253342
90	0.131651	-0.0110494			90	-0.0580245	0.0298288			90	0.0238543	0.0280539			90	-0.0300494	-0.0284199			90	0.0135561	0.0490055
120	0.156178	-0.010065			120	-0.0623323	0.0420085			120	0.0453281	0.0110949			120	-0.0497216	-0.0144969			120	0.0133162	0.0767075
Stretching	0.1	120s
Experiment #	Colony #	Cell line	Strain		Experiment #	Colony #	Cell line	Strain		Experiment #	Colony #	Cell line	Strain		Experiment #	Colony #	Cell line	Strain		Experiment #	Colony #	Cell line	Strain		Experiment #	Colony #	Cell line	Strain		Experiment #	Colony #	Cell line	Strain		Experiment #	Colony #	Cell line	Strain
1	1	MDCK	Ecadh		2	2	MDCK	Ecadh		2	3	MDCK	Ecadh		3	4	MDCK	Ecadh		3	5	MDCK	Ecadh		3	6	MDCK	Ecadh		3	7	MDCK	Ecadh		4	8	MDCK	Ecadh
Time (min)	Qxx(t)-Qxx(0)	Qxy(t)-Qxy(0)			Time (min)	Qxx(t)-Qxx(0)	Qxy(t)-Qxy(0)			Time (min)	Qxx(t)-Qxx(0)	Qxy(t)-Qxy(0)			Time (min)	Qxx(t)-Qxx(0)	Qxy(t)-Qxy(0)			Time (min)	Qxx(t)-Qxx(0)	Qxy(t)-Qxy(0)			Time (min)	Qxx(t)-Qxx(0)	Qxy(t)-Qxy(0)			Time (min)	Qxx(t)-Qxx(0)	Qxy(t)-Qxy(0)			Time (min)	Qxx(t)-Qxx(0)	Qxy(t)-Qxy(0)
0					0					0					0					0					0					0					0
30	0.0128672	0.00214297			30	-0.00858589	0.0149331			30	0.00256603	0.00537367			30	0.00177228	0.0131114			30	-0.0162553	-0.0234634			30	0.00726206	0.0118327			30	-0.00232154	0.00289577			30	0.0269109	-0.00402387
60	0.0242817	-0.00178511			60	-0.0101553	0.0180142			60	-0.00435888	-0.00113136			60	-0.00215596	0.0235614			60	-0.0146186	-0.0321325			60	0.0232	0.0205468			60	0.00108537	-0.00369214			60	-0.000953907	-0.026491
90	0.0247529	-0.00670429			90	-0.0114105	-0.00224016			90	-0.00636222	-0.00992411			90	0.0113002	0.0223149			90	-0.00332071	-0.0526354			90	0.0361123	0.0179331			90	-0.00192969	0.00994742			90	0.0182406	-0.0591851
120	0.0293228	-0.00988526			120	-0.0232824	-0.00419843			120	-0.0185346	-0.0251009			120	0.0298109	0.0365384			120	0.0118211	-0.0660441			120	0.0482768	0.0114862			120	0.0042631	0.00269786			120	0.0166925	-0.071762
Stretching	0.1	60s
Experiment #	Colony #	Cell line	Strain		Experiment #	Colony #	Cell line	Strain		Experiment #	Colony #	Cell line	Strain		Experiment #	Colony #	Cell line	Strain		Experiment #	Colony #	Cell line	Strain		Experiment #	Colony #	Cell line	Strain		Experiment #	Colony #	Cell line	Strain		Experiment #	Colony #	Cell line	Strain
1	1	MDCK	Ecadh		1	2	MDCK	Ecadh		2	3	MDCK	Ecadh		3	4	MDCK	Ecadh		4	5	MDCK	Ecadh		4	6	MDCK	Ecadh		4	7	MDCK	Ecadh		5	8	MDCK	Ecadh
Time (min)	Qxx(t)-Qxx(0)	Qxy(t)-Qxy(0)			Time (min)	Qxx(t)-Qxx(0)	Qxy(t)-Qxy(0)			Time (min)	Qxx(t)-Qxx(0)	Qxy(t)-Qxy(0)			Time (min)	Qxx(t)-Qxx(0)	Qxy(t)-Qxy(0)			Time (min)	Qxx(t)-Qxx(0)	Qxy(t)-Qxy(0)			Time (min)	Qxx(t)-Qxx(0)	Qxy(t)-Qxy(0)			Time (min)	Qxx(t)-Qxx(0)	Qxy(t)-Qxy(0)			Time (min)	Qxx(t)-Qxx(0)	Qxy(t)-Qxy(0)
0					0					0					0					0					0					0					0
30	0.0117621	0.0136633			30	0.00917419	0.00146661			30	0.00396003	-0.00934805			30	0.00306836	0.00177214			30	-0.0270367	-0.0358496			30	0.00495057	0.0312142			30	0.00846197	-0.00260232			30	-0.000317717	-0.00150457
60	0.0191082	0.0162535			60	0.00704787	0.00193647			60	0.0112098	-0.0183899			60	-0.0017604	0.00208705			60	-0.00707379	-0.00193334			60	0.00933962	0.0527441			60	0.00461385	-0.0207526			60	-0.000267091	-0.0197128
90	0.0127969	0.0129198			90	0.00185502	-0.0144548			90	0.025685	-0.0288943			90	-0.00278227	0.00292362			90	-0.011724	-0.00267877			90	0.00960822	0.0590238			90	-6.87942e-05	-0.0349888			90	-0.00639736	-0.031483
120	0.0127969	0.0129198			120	-0.00101486	-0.0255863			120	0.0188335	-0.0163109			120	-0.000134421	0.00635847			120	-0.0251705	-0.000147115			120	0.0207567	0.0242739			120	-0.00229658	-0.0160364			120	-0.0255866	-0.0247657
Stretching	0.1	20s
Experiment #	Colony #	Cell line	Strain		Experiment #	Colony #	Cell line	Strain		Experiment #	Colony #	Cell line	Strain		Experiment #	Colony #	Cell line	Strain		Experiment #	Colony #	Cell line	Strain		Experiment #	Colony #	Cell line	Strain
1	1	MDCK	Ecadh		1	2	MDCK	Ecadh		2	3	MDCK	Ecadh		3	4	MDCK	Ecadh		3	5	MDCK	Ecadh		4	6	MDCK	Ecadh
Time (min)	Qxx(t)-Qxx(0)	Qxy(t)-Qxy(0)			Time (min)	Qxx(t)-Qxx(0)	Qxy(t)-Qxy(0)			Time (min)	Qxx(t)-Qxx(0)	Qxy(t)-Qxy(0)			Time (min)	Qxx(t)-Qxx(0)	Qxy(t)-Qxy(0)			Time (min)	Qxx(t)-Qxx(0)	Qxy(t)-Qxy(0)			Time (min)	Qxx(t)-Qxx(0)	Qxy(t)-Qxy(0)
0					0					0					0					0					0
30	0.00687946	-0.0131578			30	0.0255171	-0.0195622			30	0.0208786	0.00830648			30	-0.00768393	0.00268061			30	-0.00322673	0.0149609			30	0.00167823	0.0121374
60	0.0115682	-0.00832414			60	0.00746629	-0.0340486			60	-0.00261833	0.0428993			60	-0.00894005	-0.00337264			60	0.00089126	-0.00163108			60	-0.0599556	0.0235835
90	0.00854248	-0.0168647			90	-0.0141174	-0.0383652			90	0.0350411	0.0438089			90	-0.00930051	-0.0064931			90	0.00615158	-0.012053			90	-0.0638092	0.0357481
120	0.0216659	0.00831198			120	-0.0233942	-0.0552134			120	0.0740457	0.0131169			120	-0.0134585	0.000627477			120	0.00982294	-0.0341185			120	-0.0650827	-0.0285655
Stretching	0.15	120s
Experiment #	Colony #	Cell line	Strain		Experiment #	Colony #	Cell line	Strain		Experiment #	Colony #	Cell line	Strain		Experiment #	Colony #	Cell line	Strain		Experiment #	Colony #	Cell line	Strain		Experiment #	Colony #	Cell line	Strain
1	1	MDCK	Ecadh		2	2	MDCK	Ecadh		2	3	MDCK	Ecadh		2	4	MDCK	Ecadh		3	5	MDCK	Ecadh		3	6	MDCK	Ecadh
Time (min)	Qxx(t)-Qxx(0)	Qxy(t)-Qxy(0)			Time (min)	Qxx(t)-Qxx(0)	Qxy(t)-Qxy(0)			Time (min)	Qxx(t)-Qxx(0)	Qxy(t)-Qxy(0)			Time (min)	Qxx(t)-Qxx(0)	Qxy(t)-Qxy(0)			Time (min)	Qxx(t)-Qxx(0)	Qxy(t)-Qxy(0)			Time (min)	Qxx(t)-Qxx(0)	Qxy(t)-Qxy(0)
0					0					0					0					0					0
30	-0.0119089	0.0118918			30	0.00443194	0.020646			30	-0.000285454	-0.00427577			30	0.00900914	0.0116394			30	0.0118572	0.00592627			30	0.00578698	0.00982996
60	-0.0154406	0.0311235			60	0.00234362	0.0197569			60	0.0123355	-0.00281302			60	0.0110904	0.00302717			60	0.00675327	0.0091025			60	-0.00342697	0.0290475
90	-0.018176	0.025228			90	0.0114097	0.0312212			90	0.00819531	-0.00463701			90	0.00314967	0.0108039			90	-0.0181966	0.01912			90	-0.0174986	0.0382335
120	-0.0249168	0.028542			120	0.0108958	0.0323141			120	0.00345541	-0.00515868			120	0.00685587	0.0202813			120	-0.0369884	0.0200492			120	-0.0485159	0.0493657
Stretching	0.15	60s
Experiment #	Colony #	Cell line	Strain		Experiment #	Colony #	Cell line	Strain		Experiment #	Colony #	Cell line	Strain		Experiment #	Colony #	Cell line	Strain		Experiment #	Colony #	Cell line	Strain		Experiment #	Colony #	Cell line	Strain
1	1	MDCK	Ecadh		2	2	MDCK	Ecadh		2	3	MDCK	Ecadh		2	4	MDCK	Ecadh		3	5	MDCK	Ecadh		3	6	MDCK	Ecadh
Time (min)	Qxx(t)-Qxx(0)	Qxy(t)-Qxy(0)			Time (min)	Qxx(t)-Qxx(0)	Qxy(t)-Qxy(0)			Time (min)	Qxx(t)-Qxx(0)	Qxy(t)-Qxy(0)			Time (min)	Qxx(t)-Qxx(0)	Qxy(t)-Qxy(0)			Time (min)	Qxx(t)-Qxx(0)	Qxy(t)-Qxy(0)			Time (min)	Qxx(t)-Qxx(0)	Qxy(t)-Qxy(0)
0					0					0					0					0					0
30	0.00340229	-0.00710848			30	-0.0142226	0.0029775			30	-0.00187085	-0.00353649			30	-0.0160746	-0.0122973			30	-0.00107634	0.0175737			30	-0.00820827	0.0174099
60	-0.00401346	-0.00191503			60	-0.0114428	0.00286517			60	-0.0012168	0.000903594			60	-0.026027	-0.014759			60	-0.0126452	0.00423991			60	-0.0060774	0.0136681
90	0.00400748	0.00836961			90	-0.0255825	0.00236017			90	-0.00814919	-0.00148489			90	-0.0399908	-0.00574528			90	0.0203023	-0.00302615			90	0.0129387	0.0192036
120	-0.0100635	0.0170057			120	-0.0344131	-0.00071184			120	-0.0024077	0.00101125			120	-0.0356733	-0.00677424			120	0.0137878	-0.0211452			120	0.0127336	0.00468878
Stretching	0.15	20s
Experiment #	Colony #	Cell line	Strain		Experiment #	Colony #	Cell line	Strain		Experiment #	Colony #	Cell line	Strain		Experiment #	Colony #	Cell line	Strain		Experiment #	Colony #	Cell line	Strain		Experiment #	Colony #	Cell line	Strain		Experiment #	Colony #	Cell line	Strain		Experiment #	Colony #	Cell line	Strain		Experiment #	Colony #	Cell line	Strain
1	1	MDCK	Ecadh		1	2	MDCK	Ecadh		2	3	MDCK	Ecadh		2	4	MDCK	Ecadh		2	5	MDCK	Ecadh		2	6	MDCK	Ecadh		3	7	MDCK	Ecadh		3	8	MDCK	Ecadh		3	9	MDCK	Ecadh
Time (min)	Qxx(t)-Qxx(0)	Qxy(t)-Qxy(0)			Time (min)	Qxx(t)-Qxx(0)	Qxy(t)-Qxy(0)			Time (min)	Qxx(t)-Qxx(0)	Qxy(t)-Qxy(0)			Time (min)	Qxx(t)-Qxx(0)	Qxy(t)-Qxy(0)			Time (min)	Qxx(t)-Qxx(0)	Qxy(t)-Qxy(0)			Time (min)	Qxx(t)-Qxx(0)	Qxy(t)-Qxy(0)			Time (min)	Qxx(t)-Qxx(0)	Qxy(t)-Qxy(0)			Time (min)	Qxx(t)-Qxx(0)	Qxy(t)-Qxy(0)			Time (min)	Qxx(t)-Qxx(0)	Qxy(t)-Qxy(0)
0					0					0					0					0					0					0					0					0
30	-0.0172441	-0.00138254			30	0.00112568	0.00224798			30	-0.00982275	-0.00766638			30	-0.00172143	0.000729071			30	-0.0069868	0.0140641			30	0.0018046	0.0083839			30	0.00760345	-0.000969248			30	0.00442975	-0.0226908			30	0.0194433	-0.00674174
60	-0.0118737	0.000726454			60	0.00990461	0.00748461			60	-0.00971698	-0.0023394			60	-0.00608393	0.0177665			60	-0.00128668	0.0280183			60	-0.00977334	0.0137938			60	-0.00089979	-0.00829298			60	0.00793453	-0.0126603			60	0.0224471	-0.0220934
90	-0.012888	0.0168457			90	-0.00108929	0.0229568			90	-0.0265238	-0.0147765			90	-0.0109434	0.00586413			90	-0.0136874	0.0485215			90	-0.0212432	0.00330375			90	0.00220289	-0.00704662			90	0.00204755	-0.0123357			90	0.00595114	-0.0318802
120	-0.0154858	0.00465106			120	-0.0214005	0.0255177			120	-0.0346747	-0.0197581			120	-0.0198507	-0.00131551			120	-0.0136874	0.0485215			120	-0.0265294	0.00960144			120	-0.00748327	0.00642649			120	0.0123476	-0.0104353			120	0.00849704	-0.0183863
