# Supplementary material for: Epithelial colonies in vitro elongate through collective effects
Source: eLife. 2021 Jan 4;10:e57730. doi: 10.7554/eLife.57730 (PMC7850623; doi:10.7554/eLife.57730)
Supplement: Figure 2—source data 1. [file elife-57730-fig2-data1.xlsx]

## Sheet: Figure 2c
Qxx(120)-Qxx(0)	Control	Control Nono-aligned	Stretching
	0.0483556	0.0362726	0.061899
	0.00135766	-0.0236507	-0.00756404
	0.0287393	-0.00127672	0.0133057
	0.0234508	-0.0201165	0.0424005
	0.0320751	-0.0104232	0.00846599
	0.0343086	0.102369	0.0691646
	0.0414217	0.0323601	0.0488659
	0.0250991	0.0502284	0.0224124
	0.0269756	0.0231248	0.00867355
	0.0598099	0.0563405	0.0385073
	0.0537308	0.0529699	0.0550977
	0.0480329	-0.00119768	-0.0139528
	0.0703752	-0.0443564	-0.00133012
	0.00609524	0.00487075	0.0278515
	0.0244169	-0.00233594	0.0701863
	0.0443752	-0.0438648	0.0564672
	0.0936844	-0.0331329	0.0595279
	0.118169	0.121437	0.0471334
	0.0167729	-0.000663686	-0.0740002
	0.053741	-0.0437758	0.0449939
	0.157739	0.00163462
	0.0101285	0.0242166
	0.105225	-0.02617
	0.0414728	0.00810238
	0.0435277	-0.0289139

## Sheet: Figure 2d Control
Experiment #	Colony #	Cell line	Strain		Experiment #	Colony #	Cell line	Strain		Experiment #	Colony #	Cell line	Strain		Experiment #	Colony #	Cell line	Strain		Experiment #	Colony #	Cell line	Strain		Experiment #	Colony #	Cell line	Strain		Experiment #	Colony #	Cell line	Strain		Experiment #	Colony #	Cell line	Strain		Experiment #	Colony #	Cell line	Strain		Experiment #	Colony #	Cell line	Strain
1	1	MDCK	Ecadh		2	2	MDCK	Ecadh		3	3	MDCK	Ecadh		4	4	MDCK	Ecadh		5	5	MDCK	mChery-actin/GFP-myo		6	6	MDCK	Ecadh		7	7	MDCK	Ecadh		7	8	MDCK	Ecadh		7	9	MDCK	Ecadh		8	10	MDCK	Ecadh
Time (min)	Qxx(t)-Qxx(0)	Qxy(t)-Qxy(0)			Time (min)	Qxx(t)-Qxx(0)	Qxy(t)-Qxy(0)			Time (min)	Qxx(t)-Qxx(0)	Qxy(t)-Qxy(0)			Time (min)	Qxx(t)-Qxx(0)	Qxy(t)-Qxy(0)			Time (min)	Qxx(t)-Qxx(0)	Qxy(t)-Qxy(0)			Time (min)	Qxx(t)-Qxx(0)	Qxy(t)-Qxy(0)			Time (min)	Qxx(t)-Qxx(0)	Qxy(t)-Qxy(0)			Time (min)	Qxx(t)-Qxx(0)	Qxy(t)-Qxy(0)			Time (min)	Qxx(t)-Qxx(0)	Qxy(t)-Qxy(0)			Time (min)	Qxx(t)-Qxx(0)	Qxy(t)-Qxy(0)
0					0					0					0					0					0					0					0					0					0
5	-0.003161	-0.00941395			5					5					5					5					5					5	0.000269684	-0.00355352			5	-0.00252161	0.00225031			5	0.00146603	-0.00389925			5	-0.00731428	-0.00568247
10	0.00581836	-0.0203794			10	0.00230938	0.00278047			10	0.00619455	0.000414197			10	-0.0228722	-0.00227538			10					10					10	0.000707099	-0.00313257			10	0.000987783	-0.00365978			10	0.000552339	0.00107212			10	0.00135131	-0.00439646
15	-0.0081832	-0.0157953			15					15					15					15					15					15	-0.00290677	-0.0033752			15	0.00736161	-0.00186125			15	0.00508619	-0.00536881			15	-0.00448032	-0.00184201
20	-0.0023084	-0.0237287			20	-0.00780854	-0.00256601			20	0.0148363	0.000588775			20	-0.00634912	-0.00746858			20					20	0.00501946	-0.00128164			20	0.00169621	-0.00764086			20	0.00937002	-0.00775233			20	0.00434606	-0.00376352			20	0.00622728	-0.00621085
25	0.00593528	-0.0139956			25					25					25					25					25					25	0.00723706	-0.00785927			25	0.00742281	-0.00672607			25	0.0058864	-0.00118547			25	0.00427678	-0.0030158
30	0.0020656	-0.017111			30	-0.0173866	-0.00807099			30	0.00483794	0.000986519			30	0.000376801	-0.00331457			30	-0.0150314	-0.00275595			30					30	0.00803557	-0.00500756			30	0.0106054	-0.0181012			30	0.0072332	-0.00546905			30	0.00266316	-0.00549053
35	0.00849641	-0.0151865			35					35					35					35					35	0.0165467	-0.00240649			35	0.0151292	0.00150012			35	0.0148784	-0.0212997			35	-0.00294639	-0.00613003			35	0.0163413	-0.00119113
40	0.0100701	-0.00070249			40	-0.017988	-0.00257363			40	0.00189173	0.00761451			40	-0.001616	-0.00653445			40					40	0.0154995	-0.00512125			40	0.0167038	0.00263359			40	0.0126291	-0.0197366			40	-0.00178169	-0.00990103			40	0.0130049	-7.76862e-05
45	0.0179471	-0.00491009			45					45					45					45					45	0.0155719	-0.00666052			45	0.0135237	-0.00638696			45	0.0128334	-0.023469			45	0.000371951	0.00170519			45	0.0212723	-0.00226706
50	0.0144805	-0.00089413			50	-0.0276547	-0.00684169			50	0.0139234	0.00623652			50	2.23501e-05	-0.0199697			50					50	0.0172053	-0.00798617			50	0.00733825	-0.00501327			50	0.0193162	-0.0253127			50	-0.000348945	-0.00544152			50	0.026341	-0.000500373
55	0.0215223	-0.00433288			55					55					55					55					55	0.0146644	-0.00560175			55	0.0110516	-0.00518561			55	0.0155973	-0.0216122			55	-0.0013045	-0.00292207			55	0.0304622	0.00157533
60	0.0150343	-0.0108079			60	-0.0170958	-0.0111598			60	0.0225918	0.00766934			60	0.00682909	-0.0277311			60	-0.00544555	0.00954589			60	0.0173279	-0.00834056			60	0.00742226	-0.00507802			60	0.0102426	-0.0242293			60	0.00619956	-0.00654881			60	0.0276981	0.00103581
65	0.0122782	-0.00211478			65					65					65					65					65	0.0179081	-0.00633483			65	0.0104231	-0.00763277			65	0.0160888	-0.0244358			65	0.00986336	-0.00556404			65	0.0375992	0.000397646
70	0.0103763	0.00138892			70	-0.000661276	-0.00772973			70	0.0184117	0.0138119			70	0.0170982	-0.029073			70					70	0.017921	-0.00843537			70	0.016246	-0.0122178			70	0.0102856	-0.0249848			70	0.00498104	-0.00153165			70	0.0403732	0.00843616
75	0.00134841	0.00724457			75					75					75					75					75	0.0237635	-0.0119002			75	0.0194555	-0.0121215			75	0.00891288	-0.0332699			75	0.00313387	-0.00208614			75	0.0518193	0.0104775
80	0.00647374	-0.00231942			80	0.000701436	0.00542214			80	0.0457722	-0.00468307			80	0.00551192	-0.0245831			80					80	0.0263134	-0.00477254			80	0.0265352	-0.00962368			80	0.0149003	-0.0231048			80	0.00674366	-0.00459073			80	0.0424898	0.00791756
85	0.00487576	0.00866645			85					85					85					85					85	0.0225962	-0.0102115			85	0.0192769	-0.0135527			85	0.0197898	-0.0331928			85	0.0096129	-0.00682975			85	0.0392514	0.0137469
90	0.0118304	0.005371			90	-0.000169806	0.00172745			90	0.0459969	0.0117322			90	0.0322294	-0.0445552			90	0.00554089	0.00268097			90	0.0224198	-0.00561247			90	0.0200477	-0.0219145			90	0.0168272	-0.0319347			90	0.013451	-0.00228116			90	0.0461163	0.00510339
95	0.0113682	0.0170486			95					95					95					95					95	0.0248767	-0.00143144			95	0.018278	-0.0199402			95	0.0118207	-0.0327796			95	0.01355	-0.00593123			95	0.0459088	0.00585881
100	0.0198229	0.00385602			100	-0.00163331	0.0143553			100	0.040131	0.00379677			100	0.0289472	-0.0327181			100					100	0.0257896	-0.00324539			100	0.0252018	-0.0140463			100	0.0149028	-0.0366148			100	0.0171902	-0.0106337			100	0.0578088	0.013892
105	0.024876	0.000512639			105					105					105					105					105	0.0244048	-0.0086437			105	0.0253033	-0.0167894			105	0.0213165	-0.0431063			105	0.0199424	-0.012041			105	0.0567881	0.0213477
110	0.0377401	0.00467811			110	-0.00080756	0.0203589			110	0.0446124	0.0105686			110	0.0298927	-0.043476			110					110	0.0325076	-0.0145808			110	0.0364829	-0.0206346			110	0.0170205	-0.041409			110	0.0168694	-0.0257701			110	0.0488744	0.0173752
115	0.0557974	0.0097248			115					115					115					115					115	0.0310814	-0.014608			115	0.0296125	-0.0258755			115	0.0234491	-0.0402815			115	0.0193525	-0.00789372			115	0.060478	0.0190292
120	0.0483556	-0.000925867			120	0.00135766	0.0245725			120	0.0287393	0.0231852			120	0.0234508	-0.0340209			120	0.0320751	0.00660689			120	0.0343085	-0.0126008			120	0.0414217	-0.0206042			120	0.0250991	-0.0436855			120	0.0269756	-0.0106072			120	0.0598099	0.0203951
[truncated: 36 more columns]

## Sheet: Figure 2d Stretching
Stretching	0.05	60s
Experiment #	Colony #	Cell line	Strain		Experiment #	Colony #	Cell line	Strain		Experiment #	Colony #	Cell line	Strain		Experiment #	Colony #	Cell line	Strain		Experiment #	Colony #	Cell line	Strain		Experiment #	Colony #	Cell line	Strain		Experiment #	Colony #	Cell line	Strain		Experiment #	Colony #	Cell line	Strain		Experiment #	Colony #	Cell line	Strain		Experiment #	Colony #	Cell line	Strain
1	1	MDCK	Ecadh		1	2	MDCK	Ecadh		1	3	MDCK	Ecadh		2	4	MDCK	Ecadh		3	5	MDCK	Ecadh		4	6	MDCK	Ecadh		5	7	MDCK	Ecadh		6	8	MDCK	Ecadh		7	9	MDCK	Ecadh		7	10	MDCK	Ecadh
Time (min)	Qxx(t)-Qxx(0)	Qxy(t)-Qxy(0)			Time (min)	Qxx(t)-Qxx(0)	Qxy(t)-Qxy(0)			Time (min)	Qxx(t)-Qxx(0)	Qxy(t)-Qxy(0)			Time (min)	Qxx(t)-Qxx(0)	Qxy(t)-Qxy(0)			Time (min)	Qxx(t)-Qxx(0)	Qxy(t)-Qxy(0)			Time (min)	Qxx(t)-Qxx(0)	Qxy(t)-Qxy(0)			Time (min)	Qxx(t)-Qxx(0)	Qxy(t)-Qxy(0)			Time (min)	Qxx(t)-Qxx(0)	Qxy(t)-Qxy(0)			Time (min)	Qxx(t)-Qxx(0)	Qxy(t)-Qxy(0)			Time (min)	Qxx(t)-Qxx(0)	Qxy(t)-Qxy(0)
0	0	0			0	0	0			0	0	0			0	0	0			0	0	0			0	0	0			0	0	0			0	0	0			0	0	0			0	0	0
30	0.0206008	0.0356088			30	-0.00256869	0.0203387			30	0.0118934	-0.0109472			30	0.00441898	-0.0266785			30	0.00369303	0.000195102			30	0.0112369	0.0011772			30	0.00308984	-0.0103793			30	-0.00655447	-0.00382788			30	0.00912211	-0.000352109			30	-0.0177663	0.0207677
60	0.0323522	0.0345032			60	0.00010917	0.0254574			60	0.0150571	-0.0255176			60	-0.00494104	-0.056722			60	0.00478005	-0.0103134			60	0.0421227	0.010248			60	0.016658	-0.0309759			60	0.0288061	0.00352233			60	0.00599965	-0.0189003			60	0.00469877	0.0262226
90	0.0545947	0.0672			90	-0.00360118	0.0311391			90	0.0119538	-0.0246934			90	0.0328272	-0.0598721			90	0.00315284	-0.00711917			90	0.0693121	0.00139317			90	0.0353318	-0.0469215			90	0.00788141	0.00830614			90	0.00148803	-0.0275963			90	0.0210822	0.0269157
120	0.061899	0.0914208			120	-0.00756404	0.0289742			120	0.0133057	-0.021076			120	0.0424005	-0.0609648			120	0.00846599	-0.00378752			120	0.0691646	-0.0112066			120	0.0488659	-0.0485581			120	0.0224124	0.0018039			120	0.00867355	-0.0314875			120	0.0385073	0.025537
[truncated: 40 more columns]
