# Supplementary material for: Epithelial colonies in vitro elongate through collective effects
Source: eLife. 2021 Jan 4;10:e57730. doi: 10.7554/eLife.57730 (PMC7850623; doi:10.7554/eLife.57730)
Supplement: Figure 3—source data 1. [file elife-57730-fig3-data1.xlsx]

## Sheet: Figure 3b
Stretching	0.05	20s	Single Cells
Experiment #	Cell #	Cell line	Strain		Experiment #	Cell #	Cell line	Strain		Experiment #	Cell #	Cell line	Strain		Experiment #	Cell #	Cell line	Strain		Experiment #	Cell #	Cell line	Strain		Experiment #	Cell #	Cell line	Strain		Experiment #	Cell #	Cell line	Strain		Experiment #	Cell #	Cell line	Strain		Experiment #	Cell #	Cell line	Strain		Experiment #	Cell #	Cell line	Strain
1	1	MDCK	Ecadh		1	2	MDCK	Ecadh		1	3	MDCK	Ecadh		1	4	MDCK	Ecadh		1	5	MDCK	Ecadh		1	6	MDCK	Ecadh		1	7	MDCK	Ecadh		1	8	MDCK	Ecadh		1	9	MDCK	Ecadh		1	10	MDCK	Ecadh
Time (min)	Qxx(t)-Qxx(0)	Qxy(t)-Qxy(0)			Time (min)	Qxx(t)-Qxx(0)	Qxy(t)-Qxy(0)			Time (min)	Qxx(t)-Qxx(0)	Qxy(t)-Qxy(0)			Time (min)	Qxx(t)-Qxx(0)	Qxy(t)-Qxy(0)			Time (min)	Qxx(t)-Qxx(0)	Qxy(t)-Qxy(0)			Time (min)	Qxx(t)-Qxx(0)	Qxy(t)-Qxy(0)			Time (min)	Qxx(t)-Qxx(0)	Qxy(t)-Qxy(0)			Time (min)	Qxx(t)-Qxx(0)	Qxy(t)-Qxy(0)			Time (min)	Qxx(t)-Qxx(0)	Qxy(t)-Qxy(0)			Time (min)	Qxx(t)-Qxx(0)	Qxy(t)-Qxy(0)
0	0	0			0	0	0			0	0	0			0	0	0			0	0	0			0	0	0			0	0	0			0	0	0			0	0	0			0	0	0
30	-0.198489	0.0666476			30	0.0180402	0.012659			30	0.273645	0.000541165			30	-0.10026	-0.0443183			30	-0.0686126	0.0967473			30	-0.0112652	-0.0763151			30	-0.0132521	-0.0532601			30	-0.0966502	0.0440996			30	0.0372689	-0.115414			30	0.0886811	0.0190263
60	-0.338085	0.143493			60	0.0100302	0.0276785			60	0.404905	0.000480903			60	-0.0904821	-0.013374			60	-0.0764067	0.0332635			60	-0.464387	0.197673			60	0.0230084	0.268744			60	-0.122293	0.192397			60	0.00838299	-0.0834814			60	0.113839	0.257912
90	-0.286973	0.146311			90	0.0123185	0.0146185			90	0.274306	-0.0823099			90	-0.104204	-0.0396387			90	0.0223646	-0.0305563			90	0.0131652	-0.00368524			90	0.145822	0.22068			90	-0.113776	0.310937			90	-0.00913418	-0.0299597			90	-0.429586	-0.327681
120	-0.232137	0.147916			120	0.0335791	0.0564023			120	0.369224	-0.221206			120	-0.282951	-0.165696			120	-0.00523822	0.0751916			120	-0.618938	0.407149			120	-0.137291	-0.183291			120	0.00076383	0.00545224			120	-0.0954278	-0.0385178			120	-0.523529	0.732623
[truncated: 84 more columns]

## Sheet: Figure 3d
Ecadherin Antibody
Control
Experiment #	Colony #	Cell line	Strain		Experiment #	Colony #	Cell line	Strain		Experiment #	Colony #	Cell line	Strain		Experiment #	Colony #	Cell line	Strain		Experiment #	Colony #	Cell line	Strain		Experiment #	Colony #	Cell line	Strain		Experiment #	Colony #	Cell line	Strain		Experiment #	Colony #	Cell line	Strain
1	1	MDCK	Ecadh		1	2	MDCK	Ecadh		1	3	MDCK	Ecadh		1	4	MDCK	Ecadh		1	5	MDCK	Ecadh		1	6	MDCK	Ecadh		2	7	MDCK	Ecadh		3	8	MDCK	Ecadh
Time (min)	Qxx(t)-Qxx(0)	Qxy(t)-Qxy(0)			Time (min)	Qxx(t)-Qxx(0)	Qxy(t)-Qxy(0)			Time (min)	Qxx(t)-Qxx(0)	Qxy(t)-Qxy(0)			Time (min)	Qxx(t)-Qxx(0)	Qxy(t)-Qxy(0)			Time (min)	Qxx(t)-Qxx(0)	Qxy(t)-Qxy(0)			Time (min)	Qxx(t)-Qxx(0)	Qxy(t)-Qxy(0)			Time (min)	Qxx(t)-Qxx(0)	Qxy(t)-Qxy(0)			Time (min)	Qxx(t)-Qxx(0)	Qxy(t)-Qxy(0)
0	0	0			0	0	0			0	0	0			0	0	0			0	0	0			0	0	0			0	0	0			0	0	0
30	-0.0492213	-0.00440711			30	0.0589133	-0.019582			30	0.00386449	-0.0160741			30	0.0277715	0.00737327			30	-0.0394996	-0.0288499			30	0.0719808	0.0283337			30	-0.00503912	0.0139836			30	0.0881036	0.017434
60	-0.0263797	-0.00152947			60	0.0638495	0.00288288			60	0.00387048	0.00168506			60	0.0489115	-0.0113588			60	0.00173347	-0.0300585			60	0.0848106	0.0205027			60	0.0256168	0.00822451			60	0.136815	0.00583774
90	-0.0472751	-0.0275159			90	0.0889655	0.0408379			90	0.0173695	-0.00711914			90	0.0656773	-0.0231584			90	0.0342935	-0.0195191			90	0.0731367	0.0303634			90	0.0716175	0.00619794			90	0.175265	0.00370928
120	-0.0806525	-1.71648e-05			120	0.0683641	0.0463793			120	0.0403258	-0.023232			120	0.0788608	-0.0183938			120	0.052444	0.00829911			120	0.0940495	0.00831642			120	0.171063	-0.0138431			120	0.218167	-0.0613309
Stretching	0.05	60s
Experiment #	Colony #	Cell line	Strain		Experiment #	Colony #	Cell line	Strain		Experiment #	Colony #	Cell line	Strain		Experiment #	Colony #	Cell line	Strain		Experiment #	Colony #	Cell line	Strain		Experiment #	Colony #	Cell line	Strain		Experiment #	Colony #	Cell line	Strain		Experiment #	Colony #	Cell line	Strain		Experiment #	Colony #	Cell line	Strain		Experiment #	Colony #	Cell line	Strain
1	1	MDCK	Ecadh		2	2	MDCK	Ecadh		3	3	MDCK	Ecadh		3	4	MDCK	Ecadh		3	5	MDCK	Ecadh		4	6	MDCK	Ecadh		4	7	MDCK	Ecadh		4	8	MDCK	Ecadh		4	9	MDCK	Ecadh		4	10	MDCK	Ecadh
Time (min)	Qxx(t)-Qxx(0)	Qxy(t)-Qxy(0)			Time (min)	Qxx(t)-Qxx(0)	Qxy(t)-Qxy(0)			Time (min)	Qxx(t)-Qxx(0)	Qxy(t)-Qxy(0)			Time (min)	Qxx(t)-Qxx(0)	Qxy(t)-Qxy(0)			Time (min)	Qxx(t)-Qxx(0)	Qxy(t)-Qxy(0)			Time (min)	Qxx(t)-Qxx(0)	Qxy(t)-Qxy(0)			Time (min)	Qxx(t)-Qxx(0)	Qxy(t)-Qxy(0)			Time (min)	Qxx(t)-Qxx(0)	Qxy(t)-Qxy(0)			Time (min)	Qxx(t)-Qxx(0)	Qxy(t)-Qxy(0)			Time (min)	Qxx(t)-Qxx(0)	Qxy(t)-Qxy(0)
0	0	0			0	0	0			0	0	0			0	0	0			0	0	0			0	0	0			0	0	0			0	0	0			0	0	0			0	0	0
30	0.0555172	0.0101785			30	-0.00119373	0.00695714			30	-0.0322551	0.019642			30	-0.0601065	0.000106531			30	-0.218817	-0.11711			30	-0.0517305	0.011623			30	-0.00163573	-0.0146311			30	7.42503e-06	-0.00443511			30	0.00863255	-0.00902084			30	-0.00301399	-0.0304228
60	0.0935293	-0.00554311			60	0.0105902	0.0131162			60	-0.0126807	0.015041			60	-0.0598166	0.023162			60	-0.228674	-0.097197			60	-0.0554916	0.00374861			60	-0.0178836	-0.0145608			60	-0.0116847	-0.0006513			60	0.0177137	-0.0423379			60	-0.0117267	-0.0278966
90	0.106336	-0.0337829			90	0.00883695	0.0248342			90	-0.0128366	0.0101589			90	-0.069327	0.062474			90	-0.207854	-0.103936			90	-0.0581167	0.0112828			90	-0.0208132	0.00641007			90	-0.00895136	-0.00304717			90	0.0140586	-0.0553544			90	-0.0110851	-0.0283413
120	0.142815	-0.0112963			120	-0.0193797	0.07098			120	-0.0001971	0.0163437			120	-0.0829044	0.0648529			120	-0.28331	-0.0671968			120	-0.0543764	0.0223395			120	-0.0232853	-0.00578331			120	-0.010188	-0.00286027			120	0.0192058	-0.0627771			120	-0.0212097	-0.0284058
[truncated: 20 more columns]

## Sheet: Figure 3e
Control							Stretching	5% 60s
Individual cells			Grouped by distance to the center				Individual cells			Grouped by distance to the center
Radial distance to the center (µm)	Velocity (µm/min) individual cells		Mean velocity (µm/min)	SD	Number of cells		Radial distance to the center (µm)	Velocity (µm/min) individual cells		Mean velocity (µm/min)	SD	Number of cells
10.7228	0.42057						9.06227	0.180112
13.786	0.397356						11.1771	0.0614994
15.8876	0.406471		0.421156	0.0277433	4		12.0967	0.221042
17.0773	0.460228						15				0.118032	0.0893512	3
22.9594	0.261156						19.5436	0.0715542
25							24.2568	0.105893
34.5032	0.275826						25.2334	0.092587			0.10638	0.0329019	4
34.9152	0.480687						26.7157	0.075081
35.0572	0.380131		0.354998	0.08091	5		27.1265	0.15196
36.8376	0.340636						30.6265	0.123135
39.6777	0.297712						32.32	0.0965683
42.9324	0.309512						35				0.10511	0.0156174	3
45			0.363095	0.118369	5		37.3537	0.0956272
44.0509	0.501455						40.0729	0.185702
47.1728	0.217834						41.4137	0.071829
48.1746	0.318838						42.6309	0.199487
49.9946	0.467837						42.8298	0.0630984
50.5575	0.383161						43.4317	0.104787
51.1059	0.391053						43.5247	0.140817
51.3387	0.376113						44.2874	0.136896
51.3731	0.24481						44.8114	0.190144
51.8871	0.231563						45.4107	0.159049			0.133219	0.0453293	12
51.9382	0.623261						46.8841	0.127511
52.61	0.61						49.4884	0.130148
53.2665	0.463321						49.8317	0.0891567
55.0626	0.51		0.451965	0.173359	15		50.8085	0.133274
56.1862	0.501858						50.9635	0.151887
56.3781	0.361306						51.6084	0.143591
56.5836	0.213915						51.919	0.100195
57.56	0.831826						52.3745	0.252623
58.3384	0.650058						53.395	0.166715
59.7761	0.382031						53.6723	0.114479
61.8843	0.79517						55				0.147204	0.0468356	14
62.2167	0.473073						56.1105	0.115281
65.8897	0.567627		0.511906	0.189496	5		56.2764	0.11311
66.9375	0.278951						57.9341	0.14868
67.2289	0.444708						58.2716	0.0965521
74.0274	0.37617						58.5539	0.115256
74.099	0.715865						58.8591	0.180609
75.0125	0.388379		0.445964	0.183799	4		59.2268	0.22861
76.5646	0.303442						60.2773	0.0735926
80.209	0.293795						60.324	0.110173
81.9543	0.824183						60.5215	0.112511
82.0837	0.427725						60.9749	0.101102
84.0535	0.274461						61.5216	0.190662
85			0.408809	0.190648	7		61.8006	0.179684
86.45	0.386659						61.9066	0.107875
86.8097	0.336645						62.8546	0.0730819
89.4666	0.318198						62.9433	0.132741
91.6157	0.401377						63.0327	0.05981
94.1298	0.161114						63.3325	0.0941006
95.0486	0.525319		0.389758	0.160651	4		63.8278	0.112619
99.9189	0.47122						65.3435	0.10496			0.113996	0.034187	21
102.927	0.317627						66.0782	0.110014
105.171	0.679394		0.509301	0.182145	9		66.4013	0.152102
107.401	0.392902						66.752	0.092812
108.884	0.568395						67.4297	0.0765823
109.432	0.330418						67.5526	0.106287
109.449	0.450702						67.9064	0.114159
109.812	0.861999						69.4164	0.162537
109.884	0.6						69.952	0.126511
109.907	0.385747						70.4	0.032
111.989	0.30744						71.3607	0.124426
112.509	0.81846						72.7041	0.12924
113.499	0.561725						72.974	0.0667372
113.62	0.290214						75				0.0893333	0.0372903	8
113.62	0.286362						76.9665	0.0619799
114.43	0.44811						77.0031	0.0733788
115.36	0.430976		0.425498	0.173578	14		77.2553	0.135201
116.137	0.399037						78.7343	0.0917023
116.677	0.232213						81.0971	0.232869
117.07	0.144798						81.5649	0.0827422
117.838	0.499387						81.9112	0.125935
118.4	0.630849						81.9225	0.172282
118.631	0.469417						82.8608	0.0956406
119.261	0.43798						85.7421	0.107323			0.173142	0.0825656	11
120.201	0.287169						86.0139	0.299339
120.428	0.531039						86.3466	0.107081
120.457	0.462799						88.2655	0.18003
121.118	0.39349						89.6149	0.326516
122.533	0.359139						89.6606	0.174805
122.907	0.422252						90.048	0.314974
123.153	0.422368						90.3704	0.227049
123.231	0.401278						92.1078	0.245343
124.051	0.503899						92.4318	0.130103
124.595	0.340961						92.8827	0.115671
125.225	0.328959		0.396071	0.0750031	18		92.9786	0.106667
125.514	0.301557						93.0782	0.108008
126.902	0.408207						93.6458	0.24796
127.819	0.349252						95				0.176927	0.0653053	19
128.212	0.398466						96.0533	0.160668
129.072	0.493361						97.0635	0.191241
129.277	0.272622						97.0782	0.112011
129.4	0.452452						97.504	0.217224
							97.5265	0.120594
							97.9221	0.084765
							98.6332	0.267417
							98.8173	0.199027
							99.3764	0.163594
							99.4629	0.135921
							99.4891	0.213379
							100.334	0.131015
							101.117	0.223208
							101.288	0.20248
							101.622	0.253339
							102.25	0.104249
							103.467	0.330925
							103.542	0.251431
							103.776	0.181578
							104.442	0.111012
							104.719	0.118748
							105.584	0.140024			0.180694	0.0631515	19
							105.662	0.231183
							107.193	0.154134
							107.674	0.0938727
							107.95	0.220675
							108.28	0.230002
							108.287	0.163347
							109.127	0.1308
							109.988	0.161166
							110.817	0.252411
							111.893	0.0710823
							112.014	0.10746
							112.087	0.133261
							112.174	0.150516
							114.016	0.124807
							114.136	0.208871
							114.527	0.331997
							114.623	0.190265
							115.03	0.113121			0.154771	0.0686086	15
							115.884	0.116108
							117.595	0.176693
							118.115	0.148197
							118.845	0.0940381
							119.928	0.102733
							120.143	0.358363
							121.101	0.349727
							121.291	0.103724
							121.614	0.571141
							121.635	0.259805
							121.642	0.287162
							121.655	0.213378
							121.95	0.252217
							122.229	0.126848
							122.3	0.499113
							122.552	0.159956
							122.817	0.133267
							123.822	0.117988
							123.844	0.145503
							123.902	0.199296
							124.108	0.14157
							124.396	0.137608
							124.538	0.226499
							125.584	0.205588			0.223237	0.119953	25
							126.255	0.0988501
							126.281	0.201825
							127.005	0.213221
							127.288	0.0824956
							129.119	0.285431
							129.851	0.210342
