# Supplementary material for: Epithelial colonies in vitro elongate through collective effects
Source: eLife. 2021 Jan 4;10:e57730. doi: 10.7554/eLife.57730 (PMC7850623; doi:10.7554/eLife.57730)
Supplement: Figure 4—figure supplement 2—source data 1. [file elife-57730-fig4-figsupp2-data1.xlsx]

## Sheet: Figure 4-figure supplement 2c
Boundary Cells					Leader Cells
Cell line	Strain				Cell line	Strain
MDCK	Ecadh				MDCK	Ecadh
Experiment	Colony	Cell #	Average velocity (mm/min)		Experiment	Colony	Cell #	Average velocity (mm/min)
1	1	1	0.349252		1	1	1	0.6
2	2	2	0.39349		2	2	2	0.35
2	2	3	0.359139		2	3	3	0.44
2	2	4	0.493361		2	3	4	0.31
2	3	5	0.301557		2	3	5	0.45
2	3	6	0.408207		2	3	6	0.26
2	3	7	0.398466		3	4	7	0.59
2	3	8	0.272622		3	5	8	0.55
3	4	9	0.531039		3	5	9	0.59
3	4	10	0.503899		4	6	10	0.7
3	5	11	0.462799		4	7	11	0.46
3	5	12	0.422252		4	7	12	0.45
3	5	13	0.422368		4	8	13	0.88
4	6	14	0.401278		4	9	14	0.75
4	6	15	0.340961		5	10	15	0.574702
4	6	16	0.328959		5	10	16	0.62959
4	7	17	0.452452		5	10	17	0.442507
					5	10	18	0.54516
					5	11	19	0.566168
					5	11	20	0.521369
					5	12	21	0.52

## Sheet: Figure 4-figure supplement 2d
Leader Cells
Cell line	Strain
MDCK	Ecadh
Experiment	Colony	Cell #	Directionality
1	1	1	0.950906
2	2	2	0.676326
2	3	3	0.974354
2	3	4	0.531776
2	3	5	0.911051
2	3	6	0.394937
3	4	7	0.931138
3	5	8	0.912749
3	5	9	0.963733
4	6	10	0.969864
4	7	11	0.960842
4	7	12	0.932699
4	8	13	0.908882
4	9	14	0.687332
5	10	15	0.55635
5	10	16	0.934335
5	10	17	0.960631
5	10	18	0.934401
5	11	19	0.811702
5	11	20	0.907432
5	12	21	0.753427

## Sheet: Figure 4-figure supplement 2e
Boundary Cells					Leader Cells
Cell line	Strain				Cell line	Strain
MDCK	Ecadh				MDCK	Ecadh
Experiment	Colony	Cell #	cos(2·(angle_dir - angle_pos))		Experiment	Colony	Cell #	cos(2·(angle_dir - angle_pos))
1	1	1	-0.288143		1	1	1	-0.771045
1	1	2	-0.993719		2	2	2	0.989102
1	1	3	-0.946849		2	3	3	0.999614
1	1	4	0.812975		2	3	4	0.98753
2	2	5	0.823126		2	3	5	0.842401
2	2	6	-0.418322		2	3	6	0.933492
2	2	7	0.054474		3	4	7	0.467108
2	2	8	-0.759986		3	5	8	0.816315
2	2	9	0.937385		3	5	9	0.642999
2	2	10	-0.813705		4	6	10	0.478434
2	3	11	0.276014		4	7	11	-0.911135
2	3	12	-0.596682		4	7	12	0.882259
2	3	13	0.539694		4	8	13	0.307577
2	3	14	-0.9798		4	9	14	0.838029
2	3	15	-0.726692		5	10	15	0.875071
3	4	16	0.605545		5	10	16	0.981153
3	4	17	-0.470588		5	10	17	0.997873
3	4	18	-0.880796		5	10	18	-0.024301
3	4	19	-0.840925		5	11	19	0.333247
3	4	20	-0.95723		5	11	20	0.998816
3	5	21	0.163492		5	12	21	0.0502693
3	5	22	-0.970571		5	12	22	0.77901
3	5	23	-0.8755		5	12	23	0.45697
3	5	24	0.638607		5	12	24	0.864254
3	5	25	-0.940681		5	12	25	0.971356
3	5	26	-0.894847
3	5	27	-0.999624
3	5	28	-0.875542
4	6	29	-0.996416
4	6	30	0.375834
4	6	31	-0.608373
4	6	32	0.971811
4	6	33	-0.391777
4	6	34	-0.480203
4	6	35	-0.950733
4	7	36	0.703133
4	7	37	-0.188504
4	7	38	-0.947934
4	7	39	0.999507
4	7	40	-0.39399
4	7	41	-0.913457
4	7	42	0.0208311
4	7	43	0.541401
4	8	44	-0.955274
4	8	45	-0.66344
4	8	46	-0.462309
4	8	47	0.757781
4	8	48	-0.901295
4	8	49	-0.844392
