# Supplementary material for: Epithelial colonies in vitro elongate through collective effects
Source: eLife. 2021 Jan 4;10:e57730. doi: 10.7554/eLife.57730 (PMC7850623; doi:10.7554/eLife.57730)
Supplement: Figure 4—source data 1. — For panels (c) and (d), we list the individual values corresponding to each colony and its associated fingers. For panel (e), we list the values for individual fingers in each condition. [file elife-57730-fig4-data1.xlsx]

## Sheet: Figure 4c
Cell line	Strain
MDCK	Ecadh
Experiment	Colony	Colony angle	Colony direction		Finger #	Finger angle	Net R	directionality	Weight direction
1	1	0.322	0.999937		1	18.5954	68.4013	0.950906	0.796626
2	2	66.543	-0.683095		2	112.736	28.1822	0.676326	-0.701258
	3	135.658	0.0229665		3	-175.03	52.0232	0.974354	0.384411
	3	135.658	0.0229665		4	130.815	19.95	0.531776	-0.021785
	3	135.658	0.0229665		5	-111.069	49.066	0.911051	-0.272945
	3	135.658	0.0229665		6	-30.9638	12.262	0.394937	0.043288
3	4	121.185	-0.46376		7	146.735	65.6972	0.931138	0.398273
	5	140.832	0.202172		8	128.234	60.4967	0.912749	-0.110401
	5	140.832	0.202172		9	1.48787	67.7256	0.963733	0.527477
4	6	4.445	0.987987		10	-167.036	81.5649	0.969864	0.899337
	7	154.335	0.624834		11	24.3256	53.4984	0.960841	0.341504
	7	154.335	0.624834		12	55.384	49.9946	0.932699	-0.17129
	8	3.35	0.993171		13	-158.717	96.2483	0.908882	0.736508
	9	150.648	0.519459		14	32.6753	62.0983	0.687332	0.417065
5	10	94.773	-0.986153		15	90	34.4788	0.55635	-1
	11	123.592	-0.387773		16	-114.821	64.4357	0.934335	-0.174057
	11	123.592	-0.387773		17	49.6164	72.5764	0.960632	-0.0485733
	11	123.592	-0.387773		18	-24.0675	49.6175	0.934401	0.138129
	11	123.592	-0.387773		19	81.7406	53.1009	0.811702	-0.21236
	12	9.613	0.944227		20	169.819	61.6511	0.907432	0.531296
	12	9.613	0.944227		21	23.9625	47.1376	0.753427	0.290352

## Sheet: Figure 4d
Control								Stretching
Cell line	Strain							Cell line	Strain
MDCK	Ecadh							MDCK	Ecadh
Experiment	Colony	Finger #	nucleation Angle	cos(2·nucleation angle)	Total displacement (µm)			Experiment	Colony	Finger #	Nucleation Angle	cos(2·nucleation angle)	Total displacement (µm)
1	1	1	-6.78897	0.972051	71.9328			1	1	1	-43.6453	0.0472709	58.1785
2	2	2	113.523	-0.681406	41.6695				1	2	-154.465	0.628374	40.518
	3	3	-174.806	0.983607	53.3926				1	3	156.763	0.688686	59.8804
	3	4	131.399	-0.125377	37.5158				2	4	-43.9479	0.0367155	39.1451
	3	5	-106.526	-0.83818	53.8565				2	5	-6.05824	0.977723	29.4201
	3	6	-30.0942	0.497148	31.0479				2	6	73.3673	-0.836139	26.5272
3	4	7	140.988	0.207507	70.5558				3	7	-101.516	-0.920284	36.1667
	5	8	121.667	-0.448782	66.2797				3	8	-33.7625	0.382282	21.1066
	5	9	11.2059	0.924467	70.2743				3	9	43.6407	0.0474309	47.8446
4	6	10	168.111	0.915119	84.0993				3	10	-144.432	0.323325	46.3181
	7	11	20.8334	0.747024	55.6787				3	11	-178.927	0.999298	56.8385
	7	12	64.6538	-0.633484	53.602			2	4	12	174.698	0.982921	38.9392
	8	13	-152.312	0.568178	105.897				4	13	-14.9973	0.866073	14.7678
	9	14	28.791	0.536093	90.3469				4	14	-96.2581	-0.976235	19.8715
5	10	15	91.484	-0.998659	61.9733			3	5	15	-110.168	-0.762251	20.0314
	11	16	-105.444	-0.85818	68.9642				5	16	3.80535	0.991191	30.7172
	11	17	64.458	-0.62818	75.5508				5	17	171.128	0.952426	37.4939
	11	18	-19.5968	0.775015	53.1009				5	18	-162.072	0.810493	40.6984
	11	19	96.941	-0.970792	65.4192			4	6	19	-172.195	0.963112	46.8802
	12	20	179.718	0.999951	67.9402				6	20	-128.835	-0.213557	66.888
	12	21	28.3636	0.548626	62.5643			5	7	21	167.038	0.899371	24.5093
									7	22	123.03	-0.405788	47.5412
									7	23	-17.9242	0.81057	39.3168
									7	24	-63.1411	-0.591764	26.6849
								6	8	25	-153.07	0.589772	87.1505
									9	26	18.2085	0.804718	64.5522
									10	27	-24.1842	0.664339	61.0215
									10	28	8.23726	0.958946	50.6044

## Sheet: Figure 4e
Control
Cell line	Strain		Cell line	Strain		Cell line	Strain		Cell line	Strain
MDCK	GFP-actin		MDCK	GFP-actin		MDCK	GFP-actin		MDCK	GFP-actin
Experiment	Finger #		Experiment	Finger #		Experiment	Finger #		Experiment	Finger #
1	1		2	2		3	3		3	4
Time (min)	Distance (µm)		Time (min)	Distance (µm)		Time (min)	Distance (µm)		Time (min)	Distance (µm)
0	28.95		0			0	68.48		0	53.12
30	32		30			30	72.68		30	61.12
60	35		60	37.44		60	70.08		60	71.36
90	38		90	40		90	65.6		90	82.24
120	42.52		120	53.44		120	65.28		120	85.76
Parallel to the stretching direction
Cell line	Strain		Cell line	Strain		Cell line	Strain		Cell line	Strain		Cell line	Strain		Cell line	Strain
MDCK	GFP-actin		MDCK	GFP-actin		MDCK	GFP-actin		MDCK	GFP-actin		MDCK	GFP-actin		MDCK	GFP-actin
Experiment	Finger #		Experiment	Finger #		Experiment	Finger #		Experiment	Finger #		Experiment	Finger #		Experiment	Finger #
1	1		2	2		3	3		3	4		4	5		4	6
Time (min)	Distance (µm)		Time (min)	Distance (µm)		Time (min)	Distance (µm)		Time (min)	Distance (µm)		Time (min)	Distance (µm)		Time (min)	Distance (µm)
0	42.52		0	53.44		0	69.76		0	59.52		0	65.28		0	85.76
30	66.82		30	67.2		30	77.44		30	57.28		30	60.8		30	88.64
60			60	72.32		60	91.84		60	54.08		60	68.16		60	93.44
90	98		90	64		90	89.92		90	67.72		90	70.08		90	104.32
120	68.48		120	81.39		120	96		120	63.68		120	82.24		120	106.88
Perpendicular to the stretching direction
Cell line	Strain		Cell line	Strain		Cell line	Strain
MDCK	GFP-actin		MDCK	GFP-actin		MDCK	GFP-actin
Experiment	Finger #		Experiment	Finger #		Experiment	Finger #
1	1		2	2		3	3
Time (min)	Distance (µm)		Time (min)	Distance (µm)		Time (min)	Distance (µm)
0	46.72		0	42.88		0	45.44
30	54.85		30	40.96		30	42.24
60	47.43		60	40.64		60	38.08
90	47.04		90	35.52		90	33.6
120	30.43		120	34.56		120	30.72
