# Supplementary material for: Epithelial colonies in vitro elongate through collective effects
Source: eLife. 2021 Jan 4;10:e57730. doi: 10.7554/eLife.57730 (PMC7850623; doi:10.7554/eLife.57730)
Supplement: Figure 5—figure supplement 2—source data 1. [file elife-57730-fig5-figsupp2-data1.xlsx]

## Sheet: Figure 5-figure supplement 2d
Blue curve same as in Figure 5c
% probability of experimental CDF (orange curve)
Δθ (degrees)	right y-axis
5	0.3115
10	0.055
15	0.79
20	4.1858
25	1.8956
30	0.7403
35	2.8408
40	3.0477
45	8.3403
50	0.8712
55	2.8413
60	7.852
65	1.7131
70	5.4435
75	15.045
80	10.71
85	33.763
90	100

## Sheet: Figure 5-figure supplement 2e
MDCK cells (red)							MCF 10 cells (blue)
Experiment	Colony	x-axis	y-axis	weight (size of dots)			Experiment	Colony	x-axis	y-axis	weight (size of dots)
1	1	0.66997	-0.039378	12.065			1	1	0.722	0.98782	28.275
1	2	-0.41576	-0.082628	16.422			1	2	0.56805	0.69403	75.979
1	3	0.2572	0.99795	100			2	3	-0.063433	-0.90387	26.404
1	4	0.98768	0.61576	31.301			2	4	0.98323	0.63845	45.859
1	5	0.6014	0.95992	37.265			2	5	0.82564	0.69175	52.992
1	6	0.9997	0.99717	28.36
1	7	0.94797	-0.063824	74.066
1	8	0.87421	0.18321	70.701
1	9	0.4868	0.99276	42.157
1	10	0.3898	0.9659	84.193
1	11	0.99159	0.99807	65.647
2	12	0.13896	0.63089	41.443
2	13	0.97552	-0.62536	52.31
2	14	0.88122	-0.87818	70.523
2	15	-0.75498	0.71411	10.267
3	16	0.99276	0.95405	43.497
3	17	0.91284	-0.52506	37.284
4	18	0.56988	0.99876	51.297
4	19	0.752	0.70475	29.491
