# Supplementary material for: Epithelial colonies in vitro elongate through collective effects
Source: eLife. 2021 Jan 4;10:e57730. doi: 10.7554/eLife.57730 (PMC7850623; doi:10.7554/eLife.57730)
Supplement: Figure 5—figure supplement 3—source data 1. [file elife-57730-fig5-figsupp3-data1.xlsx]

## Sheet: Figure 5 – figure supplement 4d
Cell line	Strain
MDCK	mCherry-Actin/GFP-myosin
Experiment	Colony	Break #	Nematic - Break angular distance
1	1	1	86.0496
1	1	2	7.42079
1	1	3	88.8113
1	1	4	75.9842
2	2	5	39.35
2	2	6	76.2503
2	2	7	35.2865
2	2	8	20.3822
2	3	9	56.1408
2	3	10	75.3953
2	3	11	71.0562
2	3	12	68.4858
2	3	13	68.3868
2	3	14	35.2044
2	4	15	37.2817
2	4	16	78.3662
2	4	17	80.2302
2	4	18	44.4254
2	4	19	8.33091
2	5	20	2.65758
2	5	21	7.85862
2	6	22	32.8957
2	6	23	42.4889
2	6	24	43.4467
2	6	25	4.78897
3	7	26	15.1995
3	7	24	23.5464
3	7	28	27.834
