# Supplementary material for: Epithelial colonies in vitro elongate through collective effects
Source: eLife. 2021 Jan 4;10:e57730. doi: 10.7554/eLife.57730 (PMC7850623; doi:10.7554/eLife.57730)
Supplement: Figure 5—figure supplement 4—source data 1. [file elife-57730-fig5-figsupp4-data1.xlsx]

## Sheet: Figure 5-figure supplement 5b
Control
Cell line	Strain
MDCK	EcadhGFP
Experiment	Colony	cos(2·(θnematic(2h)-θnematic(0h))
1	1	0.70892
2	2	0.967631
3	3	0.965341
4	4	0.945806
5	5	0.9552
5	6	0.598794
5	7	0.794555
6	8	0.754224
