# Supplementary material for: Epithelial colonies in vitro elongate through collective effects
Source: eLife. 2021 Jan 4;10:e57730. doi: 10.7554/eLife.57730 (PMC7850623; doi:10.7554/eLife.57730)
Supplement: Figure 5—source data 1. — For panel (c), we list the individual values used to calculate the cumulative distribution function. For panel (d), we list the values for the x-axis, the y-axis and the weight associated to each dot. [file elife-57730-fig5-data1.xlsx]

## Sheet: Figure 5c
Cell line	Strain
MDCK	Ecadh
Experiment #	Colony #	Δθ (degrees)		The blue color in 5c is Cumulative Distribution function
1	1	46.1284		CDF from this data for		Δθ (degrees)
1	2	47.3698
1	3	1.8337		The orange line is a straight line through zero
1	4	25.9965		and with a slope of 1/90
1	5	8.1386
1	6	2.1554
1	7	46.8297
1	8	39.7217
1	9	3.4497
1	10	7.503
1	11	1.782
2	12	25.442
2	13	64.3543
2	14	75.7118
2	15	22.2148
3	16	8.7186
3	17	60.836
4	18	1.4241
4	19	22.5953

## Sheet: Figure 5d
Cell line	Strain
MDCK	Ecadh
Experiment #	Colony #	y-axis θ_fit (0 hr)	x-axis θ_nematic (0 h)	weight (size of dots)
1	1	74.971	129.47	21.188
1	2	129.77	104.79	29.829
1	3	170.14	163.69	36.743
1	4	149.9	172.82	22.14
1	5	32.813	24.861	28.017
1	6	165.58	161.64	40.688
1	7	133.34	133.85	57.569
1	8	106.03	105.08	54.609
1	9	66.248	62.989	26.494
1	10	49.996	57.831	19.418
1	11	1.3961	2.9759	100
2	12	23.739	2.4439	59.731
2	13	104.12	100.76	26.099
2	14	145.01	155.51	83.865
2	15	97.858	93.904	3.3763
3	16	166.37	135.55	35.875
3	17	163.06	169.46	43.058
4	18	149.83	149.98	25.563
4	19	136.05	145.69	48.637
