# Supplementary material for: Epithelial colonies in vitro elongate through collective effects
Source: eLife. 2021 Jan 4;10:e57730. doi: 10.7554/eLife.57730 (PMC7850623; doi:10.7554/eLife.57730)
Supplement: Figure 6—figure supplement 3—source data 1. [file elife-57730-fig6-figsupp3-data1.xlsx]

## Sheet: Figure 6-figure supplement 3
Control
Cell Line	Strain							Cell Line	Strain							Cell Line	Strain							Cell Line	Strain
MDCK	GFP-Ecadherin							MDCK	GFP-Ecadherin							MDCK	GFP-Ecadherin							MDCK	mCherry-actin/GFP-myosin
Experiment	Colony							Experiment	Colony							Experiment	Colony							Experiment	Colony
1	1							1	2							1	3							2	4
Shear XX								Shear XX								Shear XX								Shear XX
Time	Total shear	Cell elongation change	T1	Correlation effects	Cell division	T2		Time	Total shear	Cell elongation change	T1	Correlation effects	Cell division	T2		Time	Total shear	Cell elongation change	T1	Correlation effects	Cell division	T2		Time	Total shear	Cell elongation change	T1	Correlation effects	Cell division	T2
0	0	0	0	0	0	0		0	0	0	0	0	0	0		0	0	0	0	0	0	0		0	0	0	0	0	0	0
10	0.00344	0.0201	-0.0134	-0.00116	-0.00218	5e-17		5	0.0131	0.00522	0.00983	0.00157	-0.00356	4.33e-16		5	-0.00248	-0.00826	0.00514	0.000645	2.43e-17	1.84e-17		30	0.00422	0.0714	-0.0524	-0.00484	-0.01	-6.84e-17
20	0.00374	0.033	-0.0252	-0.00184	-0.00218	1.45e-16		10	0.0202	0.012	0.00845	0.00155	-0.00155	-0.000315		10	-0.00319	-0.0146	0.0118	-0.000187	-0.000244	-5.86e-18		60	0.0135	0.0294	-0.0124	0.00654	-0.01	5.03e-16
30	0.00696	0.0371	-0.0224	-0.00559	-0.00218	3.08e-05		15	0.0297	0.0313	-0.00085	-0.000465	3.92e-05	-0.000368		15	-0.0041	-0.0221	0.0168	0.00143	-0.000244	2.56e-16		90	0.0156	0.012	-0.00588	0.0164	-0.00698	3.87e-16
40	0.00822	0.0203	-0.00451	-0.00537	-0.00218	3.08e-05		20	0.0389	0.0195	0.0211	-0.00181	0.000475	-0.000368		20	-0.00324	-0.0126	0.00719	0.00297	-0.000722	2.86e-16		120	0.0275	0.0261	-0.00921	0.0166	-0.00609	6.36e-16
50	0.0112	0.0353	-0.0183	-0.00353	-0.00218	3.08e-05		25	0.0425	0.0384	0.00318	0.000844	0.000475	-0.000368		25	-0.00653	-0.0128	0.00297	0.00442	-0.000722	-0.000267
60	0.0153	0.0322	-0.0157	-0.00179	0.000533	0.000136		30	0.048	0.0377	0.0154	-0.00509	0.000475	-0.000368		30	-0.0043	-0.00809	0.00113	0.00328	-0.000241	-0.000267
70	0.0192	0.0452	-0.0235	-0.00116	-0.00144	0.000136		35	0.0555	0.0696	-0.00574	-0.00836	0.000475	-0.000368		35	-0.000672	-0.0162	0.0121	0.00399	-0.000241	-0.000267
80	0.0211	0.0351	-0.0108	-0.00234	-0.00144	0.000403		40	0.0615	0.0751	-0.00819	-0.00791	0.00349	-0.000368		40	-0.0015	-0.00631	-0.00156	0.00701	-0.000241	-0.000267
90	0.0217	0.0324	-0.00628	-0.00178	-0.00327	0.00055		45	0.0648	0.0725	-0.00276	-0.00958	0.00567	-0.000368		45	-0.00157	-0.013	0.00363	0.00846	-0.000257	-0.000267
100	0.0233	0.033	-0.00425	-0.00283	-0.00327	0.000555		50	0.0657	0.0699	0.000425	-0.00926	0.00567	-0.000368		50	-0.000818	-0.023	0.0142	0.00861	-0.000257	-0.000267
110	0.025	0.033	-0.00376	-0.0041	-0.000798	0.000555		55	0.0696	0.0754	-0.00133	-0.0104	0.00736	-0.00038		55	0.00148	-0.0176	0.00695	0.0121	0.000527	-0.000267
120	0.0284	0.0377	-0.00611	-0.00166	-0.00238	0.00076		60	0.0707	0.0873	-0.00862	-0.0152	0.00859	-0.00038		60	0.00265	-0.0111	0.00419	0.00953	0.000527	-0.000267
								65	0.0756	0.0861	-0.0062	-0.0144	0.0112	-9.97e-05		65	0.00512	-0.0174	0.0158	0.0067	0.000527	-0.000267
								70	0.0789	0.0713	0.00992	-0.0124	0.0112	-9.97e-05		70	0.00318	-0.00882	0.0023	0.00962	0.000527	-0.000267
								75	0.0825	0.0801	0.00729	-0.0136	0.00997	-9.97e-05		75	0.00563	-0.00632	0.00219	0.00968	0.000527	-0.000267
								80	0.0852	0.0822	0.0091	-0.0147	0.00997	-9.97e-05		80	0.00736	-0.00826	0.00625	0.00929	0.000527	-0.000267
								85	0.0873	0.083	0.0145	-0.0188	0.00997	-9.97e-05		85	0.0096	-0.00883	0.00814	0.00962	0.000527	0.000347
								90	0.0904	0.0763	0.0274	-0.0219	0.00997	-9.97e-05		90	0.0117	-0.00469	0.00581	0.00988	0.000527	0.000347
								95	0.0939	0.122	-0.00964	-0.0275	0.00997	-9.97e-05		95	0.0158	0.00455	0.00189	0.00873	0.000527	0.000347
								100	0.0986	0.126	-0.0057	-0.0307	0.00997	-9.97e-05		100	0.0196	0.0196	-0.00883	0.00816	0.000527	0.000347
								105	0.101	0.135	-0.00987	-0.0327	0.00997	-9.97e-05		105	0.0239	0.00242	0.0119	0.00888	0.000527	0.000347
								110	0.102	0.135	-0.00622	-0.0359	0.00997	-9.97e-05		110	0.0244	0.00892	0.0071	0.00772	0.000527	0.000347
								115	0.102	0.126	0.00766	-0.0396	0.00997	-9.97e-05		115	0.0298	0.013	0.00637	0.00972	0.000527	0.000347
								120	0.102	0.127	0.00579	-0.0386	0.00935	-1.65e-07		120	0.033	0.0212	0.00814	0.00317	0.000527	0.000112
Shear XY								Shear XY								Shear XY								Shear XY
Time	Total shear	Cell elongation change	T1	Correlation effects	Cell division	T2		Time	Total shear	Cell elongation change	T1	Correlation effects	Cell division	T2		Time	Total shear	Cell elongation change	T1	Correlation effects	Cell division	T2		Time	Total shear	Cell elongation change	T1	Correlation effects	Cell division	T2
0	0	0	0	0	0	0		0	0	0	0	0	0	0		0	0	0	0	0	0	0		0	0	0	0	0	0	0
10	0.00275	-0.0175	0.0156	0.00117	0.00347	-6.67e-16		5	0.00455	0.0214	-0.0162	0.000589	-0.00122	3.78e-17		5	0.00134	0.000862	-0.000781	0.00126	3.54e-17	-2.29e-16		30	-0.00175	-0.00218	-0.0125	0.0159	-0.00297	2.76e-17
20	0.000722	-0.0262	0.0121	0.0107	0.00347	-9.04e-16		10	0.0069	0.0182	-0.0121	0.00175	-0.000217	-0.000678		10	0.000695	0.0134	-0.0166	0.0016	0.00231	-2.64e-16		60	-0.013	-0.0723	0.0354	0.0268	-0.00297	1.15e-16
30	0.00133	-0.0317	0.0111	0.0181	0.00347	-0.000226		15	0.0148	0.00921	-0.00119	0.00742	6.43e-06	-0.000631		15	0.000916	0.0178	-0.0189	-0.000348	0.00231	2.3e-16		90	-0.00658	-0.00882	-0.0361	0.0373	0.001	-3.33e-16
40	0.000818	-0.0187	-0.00454	0.0202	0.00347	-0.000226		20	0.0163	0.0394	-0.0263	0.00411	-0.00023	-0.000631		20	-0.00171	0.0256	-0.0281	0.000522	0.000497	-2.77e-18		120	-1e-08	-0.0176	-0.015	0.0352	-0.00268	-5.18e-16
50	8.3e-06	-0.0274	0.000162	0.0234	0.00347	-0.000226		25	0.0216	0.0478	-0.0231	-0.00215	-0.00023	-0.000631		25	-0.00678	0.0263	-0.0369	0.00372	0.000497	-0.000229
60	0.000102	-0.0263	-0.00472	0.0255	0.00533	-0.000311		30	0.019	0.031	-0.014	0.0029	-0.00023	-0.000631		30	-0.00718	0.0387	-0.0472	0.00259	-0.000825	-0.000229
70	0.000755	-0.0361	0.00151	0.028	0.00685	-0.000311		35	0.0177	0.0271	-0.0116	0.00309	-0.00023	-0.000631		35	-0.00996	0.0515	-0.0632	0.00301	-0.000825	-0.000229
80	0.000492	-0.0179	-0.0136	0.0247	0.00685	-0.00038		40	0.0221	0.0337	-0.0172	0.00448	0.00183	-0.000631		40	-0.00716	0.0494	-0.0601	0.00485	-0.000825	-0.000229
90	0.00081	-0.0243	-0.00601	0.0254	0.00555	-0.000657		45	0.0165	0.0169	-0.000543	-0.00119	0.0021	-0.000631		45	-0.00978	0.0491	-0.0629	0.00199	0.00241	-0.000229
100	0.00179	-0.00862	-0.0198	0.0244	0.00555	-0.000637		50	0.017	0.0187	0.00155	-0.00467	0.0021	-0.000631		50	-0.00729	0.063	-0.0749	0.00267	0.00241	-0.000229
110	0.00108	-0.0181	-0.00853	0.0232	0.00425	-0.000637		55	0.0187	0.0168	0.0033	-0.00265	0.00229	-0.000656		55	-0.00437	0.0412	-0.051	0.00169	0.0042	-0.000229
120	7.9e-09	-0.0174	-0.0126	0.0261	0.00377	-0.000762		60	0.016	0.0341	-0.0187	0.0015	-2.77e-05	-0.000656		60	-0.00299	0.0461	-0.0509	-0.00192	0.0042	-0.000229
								65	0.0143	0.0287	-0.0182	0.00364	0.00111	-0.000625		65	-0.00442	0.0474	-0.0539	-0.00165	0.0042	-0.000229
								70	0.00507	0.036	-0.0313	0.000114	0.00111	-0.000625		70	-0.00165	0.0482	-0.0542	0.000722	0.0042	-0.000229
								75	-0.000279	0.0578	-0.0607	0.0014	0.00221	-0.000625		75	-0.0016	0.0393	-0.0434	-0.00122	0.0042	-0.000229
								80	-0.00108	0.0333	-0.0371	0.00152	0.00221	-0.000625		80	-0.000599	0.0592	-0.062	-0.00144	0.0042	-0.000229
								85	-0.00427	0.042	-0.0519	0.00449	0.00221	-0.000625		85	-0.000341	0.0496	-0.0541	-0.00176	0.0042	0.002
								90	-0.00659	0.0415	-0.0521	0.00281	0.00221	-0.000625		90	-0.00509	0.0503	-0.0592	-0.00209	0.0042	0.002
								95	-9.11e-05	0.00755	-0.02	0.0112	0.00221	-0.000625		95	-0.00397	0.0471	-0.0547	-0.00225	0.0042	0.002
								100	-0.000591	0.0167	-0.0306	0.0121	0.00221	-0.000625		100	-0.00315	0.0434	-0.0492	-0.00328	0.0042	0.002
								105	0.00285	0.0335	-0.0422	0.0104	0.00221	-0.000625		105	-0.00232	0.0395	-0.0468	-0.000871	0.0042	0.002
								110	0.00187	0.0386	-0.0481	0.0102	0.00221	-0.000625		110	0.000415	0.0106	-0.0176	0.00159	0.0042	0.002
								115	0.00163	0.0334	-0.0431	0.0101	0.00221	-0.000625		115	-0.00169	0.000943	-0.00887	0.000377	0.0042	0.002
								120	1e-09	0.0372	-0.0539	0.0146	0.00457	-0.00198		120	1.47e-08	0.021	-0.031	0.00411	0.0042	0.00209
Stretching
Cell Line	Strain							Cell Line	Strain							Cell Line	Strain							Cell Line	Strain
MDCK	GFP-Ecadherin							MDCK	GFP-Ecadherin							MDCK	GFP-Ecadherin							MDCK	GFP-Ecadherin
Experiment	Colony							Experiment	Colony							Experiment	Colony							Experiment	Colony
1	1							2	2							3	3							4	4
Shear XX								Shear XX								Shear XX								Shear XX
Time	Total shear	Cell elongation change	T1	Correlation effects	Cell division	T2		Time	Total shear	Cell elongation change	T1	Correlation effects	Cell division	T2		Time	Total shear	Cell elongation change	T1	Correlation effects	Cell division	T2		Time	Total shear	Cell elongation change	T1	Correlation effects	Cell division	T2
0	0	0	0	0	0	0		0	0	0	0	0	0	0		0	0	0	0	0	0	0		0	0	0	0	0	0	0
30	0.00157	0.00838	-0.000739	-0.00618	7.77e-05	4.63e-05		30	0.0188	-0.0389	0.054	0.00659	-0.00294	6.92e-06		30	0.0036	0.00332	0.0211	-0.0154	-0.00541	-3.86e-16		30	0.00879	-0.00509	0.00275	0.0106	0.000521	-1.27e-17
60	0.00203	-0.000902	0.0127	-0.0106	0.000855	4.63e-05		60	0.0238	-0.0431	0.0751	8.67e-05	-0.00767	-0.000656		60	0.00958	-0.00296	0.0362	-0.0213	-0.00228	-4.17e-16		60	0.017	-0.00907	0.0175	0.0148	-0.00632	2.54e-16
90	0.00361	0.0104	0.00838	-0.0159	0.000855	4.63e-05		90	0.0329	-0.0572	0.109	-0.011	-0.00767	-0.000505		90	0.00912	-0.0369	0.0793	-0.031	-0.00228	-1.17e-16		90	0.0302	0.00504	0.0247	0.0136	-0.0136	0.00048
120	0.00764	-0.00229	0.0286	-0.0195	0.000855	6.1e-05		120	0.0461	-0.0359	0.0971	-0.0123	-0.00229	-0.000505		120	0.0163	0.00117	0.0483	-0.0308	-0.00228	-2.5e-16		120	0.0386	-0.00992	0.0384	0.0209	-0.0112	0.00048
Shear XY								Shear XY								Shear XY								Shear XY
Time	Total shear	Cell elongation change	T1	Correlation effects	Cell division	T2		Time	Total shear	Cell elongation change	T1	Correlation effects	Cell division	T2		Time	Total shear	Cell elongation change	T1	Correlation effects	Cell division	T2		Time	Total shear	Cell elongation change	T1	Correlation effects	Cell division	T2
0	0	0	0	0	0	0		0	0	0	0	0	0	0		0	0	0	0	0	0	0		0	0	0	0	0	0	0
30	0.00223	-0.00171	0.00313	0.00195	-0.000934	-0.0002		30	0.00432	0.0978	-0.0697	-0.0124	-0.0116	0.0003		30	0.00104	0.0167	-0.0112	-0.000194	-0.00422	2.93e-16		30	0.00405	-0.000354	0.00305	0.00296	-0.00158	-7.81e-17
60	0.00477	-0.0124	0.016	0.00216	-0.000789	-0.0002		60	-0.00206	0.0537	-0.0438	-0.0104	-0.00391	0.00227		60	-0.00106	0.000699	0.00721	0.00203	-0.011	6.95e-17		60	0.00217	0.0316	-0.0132	0.00128	-0.0176	-1.66e-16
90	0.00349	-0.00889	0.0133	7.12e-05	-0.000789	-0.0002		90	-0.00215	0.0826	-0.0731	-0.0101	-0.00391	0.00223		90	-5.1e-07	-0.00406	0.0058	0.00926	-0.011	1.2e-16		90	-0.00261	0.0273	-0.0194	0.00426	-0.0147	-3.35e-05
120	0	-0.014	0.0174	-0.00247	-0.000789	-0.000222		120	-1.7e-09	0.0603	-0.0485	-0.012	-0.00215	0.00223		120	1.83e-10	-0.0191	0.0186	0.0115	-0.011	-2.42e-16		120	0	0.00639	-0.00292	0.00813	-0.0115	-3.35e-05
