# Supplementary material for: Epithelial colonies in vitro elongate through collective effects
Source: eLife. 2021 Jan 4;10:e57730. doi: 10.7554/eLife.57730 (PMC7850623; doi:10.7554/eLife.57730)
Supplement: Figure 7—figure supplement 1—source data 1. [file elife-57730-fig7-figsupp1-data1.xlsx]

## Sheet: Figure 7-figure supplement 1
Figure 7 - supplementary figure 1									Figure 7 - supplementary figure 1
	cellular active stress and biased edge tension									cellular active stress, biased edge tension and cell motility
a)	cumulative shear xx								a)	cumulative shear xx
Time (min)	total shear	cell elongation	T1 transitions	correlation	cell division	cell death			Time (min)	total shear	cell elongation	T1 transitions	correlation	cell division	cell death
0	0	0	0	0	0	0			0	0	0	0	0	0	0
4	0.0020301	-0.035213	0.036506	0.00073358	-4.8476e-17	-3.5269e-16			4	0.0028146	-0.02658	0.02669	0.0027013	3.7632e-16	-1.3855e-16
8	0.0029429	-0.048942	0.05007	0.0018116	-1.663e-16	-3.0421e-16			8	0.0050223	-0.035997	0.035898	0.0051169	2.3316e-16	-5.1487e-16
12	0.0042934	-0.060552	0.061395	0.0034463	-6.7185e-16	-1.8639e-16			12	0.0079588	-0.054804	0.055723	0.0070332	-2.7214e-16	-3.7171e-16
16	0.0051754	-0.065341	0.066038	0.004476	-6.5785e-16	3.1916e-16			16	0.011331	-0.069628	0.071459	0.0094918	1.6938e-16	1.3359e-16
20	0.0063616	-0.062565	0.064363	0.0045617	-4.5498e-16	3.0516e-16			20	0.014463	-0.069573	0.073944	0.010088	1.7081e-16	-3.0793e-16
24	0.0075214	-0.060727	0.063502	0.0047433	-5.0965e-16	1.0229e-16			24	0.017186	-0.084945	0.090103	0.012021	-3.3841e-16	-3.0936e-16
28	0.0086595	-0.061647	0.065043	0.0052591	-1.9224e-16	1.5696e-16			28	0.020075	-0.091364	0.097936	0.013497	-6.882e-16	1.9986e-16
32	0.0095916	-0.06253	0.066116	0.0060008	-1.4745e-16	-1.6045e-16			32	0.023242	-0.091226	0.099945	0.014515	-8.9343e-16	5.4964e-16
36	0.010833	-0.081469	0.085371	0.006927	-3.5905e-16	-2.0524e-16			36	0.026048	-0.10312	0.11382	0.015347	-7.2482e-16	7.5488e-16
40	0.01237	-0.084014	0.088292	0.0080888	-6.5362e-16	6.3554e-18			40	0.029211	-0.10793	0.12103	0.016098	-3.3705e-16	5.8627e-16
44	0.013978	-0.090184	0.095711	0.0084482	-5.3718e-16	3.0093e-16			44	0.032625	-0.11635	0.1323	0.016669	-6.857e-17	1.985e-16
48	0.016202	-0.091172	0.099307	0.0080649	-1.899e-16	1.8448e-16			48	0.035913	-0.12236	0.14119	0.017077	1.7955e-16	-6.9985e-17
52	0.018668	-0.095139	0.10536	0.0084443	-1.5073e-16	-1.6279e-16			52	0.038754	-0.12577	0.14721	0.017313	2.2836e-16	-3.1811e-16
56	0.020671	-0.094673	0.10666	0.0086816	-4.7172e-16	-2.0197e-16			56	0.042147	-0.12525	0.14992	0.017478	-2.6952e-17	-3.6691e-16
60	0.022641	-0.097677	0.11152	0.008798	-5.8934e-16	1.1903e-16			60	0.045648	-0.12153	0.14972	0.017458	-2.3791e-16	-1.116e-16
64	0.02436	-0.10322	0.11873	0.0088455	-2.1991e-16	2.3665e-16			64	0.049093	-0.12001	0.15228	0.016825	2.459e-16	9.9359e-17
68	0.026291	-0.10403	0.12181	0.0085069	-2.7169e-16	-1.3278e-16			68	0.053145	-0.13152	0.16719	0.017474	8.6201e-17	-3.8445e-16
72	0.028223	-0.10145	0.12161	0.008053	-2.531e-16	-8.0996e-17			72	0.057273	-0.13694	0.17746	0.016751	6.8529e-17	-2.2476e-16
76	0.030326	-0.10498	0.12691	0.0083952	-4.2148e-16	-9.959e-17			76	0.061133	-0.13935	0.18585	0.014639	3.1816e-16	-2.0708e-16
80	0.032362	-0.10838	0.13245	0.0082801	-6.2286e-16	6.8789e-17			80	0.065615	-0.14242	0.19421	0.013822	4.7308e-16	-4.5672e-16
84	0.034454	-0.11512	0.14084	0.0087279	-4.4029e-16	2.7017e-16			84	0.070321	-0.13752	0.19565	0.012189	5.9198e-16	-6.1163e-16
88	0.036261	-0.11326	0.14084	0.0086726	-3.3672e-16	8.7596e-17			88	0.074722	-0.13452	0.19811	0.011136	6.3374e-16	-7.3053e-16
92	0.038419	-0.11296	0.14254	0.0088292	-5.4786e-16	-1.597e-17			92	0.078722	-0.13859	0.20748	0.0098294	6.308e-16	-7.7229e-16
96	0.040261	-0.11265	0.14389	0.0090145	-4.3746e-16	1.9517e-16			96	0.082582	-0.13927	0.2127	0.0091504	1.1524e-15	-7.6936e-16
100	0.041804	-0.11379	0.14573	0.0098549	-2.5405e-16	8.4774e-17			100	0.086395	-0.1405	0.21944	0.0074523	1.2406e-15	-1.2909e-15
104	0.043368	-0.11825	0.15149	0.010117	-2.2471e-16	-9.8637e-17			104	0.089333	-0.12833	0.21265	0.005019	1.6689e-15	-1.3791e-15
108	0.045025	-0.12209	0.15671	0.010394	-6.7825e-16	-1.2798e-16			108	0.093212	-0.12742	0.21641	0.0042222	1.2604e-15	-1.8075e-15
112	0.047246	-0.12541	0.16177	0.010872	-1.0264e-15	3.2556e-16			112	0.097007	-0.12641	0.22026	0.0031635	1.6843e-15	-1.3989e-15
116	0.048937	-0.12555	0.16271	0.011762	-1.1355e-15	6.7373e-16			116	0.10118	-0.13175	0.23074	0.0021875	1.6575e-15	-1.8229e-15
120	0.051169	-0.12881	0.16764	0.012327	-7.3503e-16	7.8281e-16			120	0.10487	-0.12637	0.23022	0.0010143	1.6859e-15	-1.796e-15
a)	cumulative shear xy								a)	cumulative shear xy
Time (min)	total shear	cell elongation	T1 transitions	correlation	cell division	cell death			Time (min)	total shear	cell elongation	T1 transitions	correlation	cell division	cell death
0	0	0	0	0	0	0			0	0	0	0	0	0	0
4	2.4972e-05	-0.0002695	0.00059409	-0.00029773	-8.5818e-17	-2.3775e-16			4	-0.0017241	-0.026901	0.025962	-0.00078356	1.7139e-16	-9.3076e-17
8	0.0003221	0.0010085	-0.001325	0.00063932	9.5335e-18	-1.5194e-16			8	-0.0036873	-0.036009	0.033603	-0.0012798	-5.17e-17	-2.6447e-16
12	-0.00016231	0.0045428	-0.0048262	0.00012066	-2.2496e-16	-2.4729e-16			12	-0.005143	-0.052257	0.048249	-0.0011366	1.9266e-16	-4.1376e-17
16	-0.00038147	0.0065293	-0.0066921	-0.00022036	-4.018e-16	-1.2796e-17			16	-0.0063245	-0.053018	0.04862	-0.0019335	-1.2799e-16	-2.8574e-16
20	-0.00036303	0.0077789	-0.00802	-0.0001246	-1.2187e-16	1.6404e-16			20	-0.0078592	-0.057618	0.052757	-0.0030081	3.8002e-16	3.4917e-17
24	0.00014211	0.0032626	-0.0031476	2.4852e-05	-1.0889e-16	-1.1589e-16			24	-0.0092968	-0.060617	0.05519	-0.0038772	1.4791e-16	-4.7309e-16
28	0.00016575	-0.00078229	9.3295e-05	0.00085225	2.1167e-16	-1.2886e-16			28	-0.010567	-0.071291	0.06565	-0.0049346	-2.5035e-16	-2.4098e-16
32	0.000628	0.0052251	-0.0056315	0.0010324	7.244e-17	-4.4942e-16			32	-0.0111	-0.085079	0.079179	-0.0052053	-6.7573e-17	1.5727e-16
36	0.00056206	0.0027643	-0.0036284	0.0014207	3.6797e-17	-3.1019e-16			36	-0.01135	-0.095436	0.087634	-0.0035583	-4.8774e-16	-2.5503e-17
40	0.0011213	0.00055881	-3.8738e-05	0.00059532	9.7042e-17	-2.7455e-16			40	-0.011737	-0.093852	0.086501	-0.0043961	-2.2491e-16	3.9467e-16
44	0.00033407	0.0048765	-0.0053961	0.00084597	5.1772e-16	-3.348e-16			44	-0.011755	-0.10017	0.093298	-0.004896	-4.4619e-17	1.3183e-16
48	0.00034677	0.00060232	-0.0015317	0.0012685	5.0838e-16	-7.5547e-16			48	-0.011981	-0.1116	0.10594	-0.0063376	2.0329e-17	-4.8458e-17
52	-0.00029323	-0.00049107	-0.0010345	0.0012249	2.9746e-16	-7.4613e-16			52	-0.011515	-0.11208	0.10902	-0.0084579	1.6127e-16	-1.1341e-16
56	-0.00046376	-0.008505	0.0064143	0.0016191	2.8691e-16	-5.3521e-16			56	-0.010771	-0.11376	0.1129	-0.0099141	-1.21e-16	-2.5435e-16
60	-0.00065455	-0.0021808	-3.201e-05	0.0015494	8.2943e-16	-5.2466e-16			60	-0.010687	-0.11221	0.11317	-0.011661	1.1165e-16	2.7923e-17
64	-0.00055582	-0.0052746	0.0031392	0.0015688	1.1033e-15	-1.0672e-15			64	-0.011231	-0.11651	0.11832	-0.013055	1.0464e-16	-2.0473e-16
68	-0.00067242	-0.0035486	0.0015049	0.0013589	7.5281e-16	-1.341e-15			68	-0.010765	-0.11576	0.11902	-0.014034	2.5413e-16	-1.9772e-16
72	-0.0012199	-0.0039147	0.0010836	0.0015987	1.0793e-15	-9.9056e-16			72	-0.010328	-0.11727	0.12265	-0.015712	4.0157e-16	-3.472e-16
76	-0.0012389	-0.0070829	0.004373	0.0014581	9.7333e-16	-1.3171e-15			76	-0.0096017	-0.12293	0.13077	-0.017447	4.4191e-16	-4.9465e-16
80	-0.0013157	-0.0071926	0.0046764	0.0011875	1.1126e-15	-1.2111e-15			80	-0.0091367	-0.12668	0.13651	-0.018972	2.9859e-16	-5.3498e-16
84	-0.0012282	-0.0031352	0.00080816	0.0010852	1.0888e-15	-1.3504e-15			84	-0.0077476	-0.12788	0.14051	-0.020369	4.1704e-16	-3.9167e-16
88	-0.00089045	-0.0024239	0.00080816	0.00071204	1.256e-15	-1.3265e-15			88	-0.0069895	-0.12491	0.13966	-0.021743	-1.014e-16	-5.1011e-16
92	-0.00075187	-0.0060292	0.004444	0.00081955	9.593e-16	-1.4937e-15			92	-0.005856	-0.11897	0.13646	-0.023338	8.367e-17	8.3258e-18
96	-0.00097241	-0.0079769	0.0062391	0.00075184	1.4361e-15	-1.1971e-15			96	-0.0048378	-0.1161	0.13698	-0.025721	2.0355e-16	-1.7675e-16
100	-0.00071899	-0.0055742	0.0047045	0.00013673	1.2895e-15	-1.6739e-15			100	-0.003726	-0.11235	0.13654	-0.027912	-8.0293e-17	-2.9663e-16
104	-0.00016392	-0.0058804	0.0061817	-0.00047882	1.3977e-15	-1.5273e-15			104	-0.0032808	-0.11306	0.14038	-0.030594	-1.3467e-16	-1.2783e-17
108	-4.7494e-05	-0.0093492	0.010099	-0.00081175	1.2053e-15	-1.6355e-15			108	-0.0023702	-0.10574	0.13677	-0.033397	-2.3613e-16	4.1592e-17
112	-0.00018684	-0.0047889	0.0054907	-0.00090244	1.0698e-15	-1.443e-15			112	-0.0016326	-0.10401	0.13751	-0.035127	-7.0973e-16	1.4305e-16
116	-0.0001265	-0.0040658	0.0048243	-0.00089875	1.0323e-15	-1.3076e-15			116	-0.0013127	-0.10166	0.13694	-0.036585	-7.9967e-16	6.1666e-16
120	-1.8974e-19	-0.0014708	0.0019771	-0.000519	9.8003e-16	-1.27e-15			120	7.1557e-18	-0.11047	0.1486	-0.038127	-4.172e-16	7.066e-16
b)	cumulative shear xx								b)	cumulative shear xx
Time (min)	total shear	cell elongation	T1 transitions	correlation	cell division	cell death			Time (min)	total shear	cell elongation	T1 transitions	correlation	cell division	cell death
0	0	0	0	0	0	0			0	0	0	0	0	0	0
4	0.0042456	-0.010871	0.015419	-0.00030457	-5.7634e-16	-1.9032e-16			4	0.0034206	-0.0074968	0.011333	-0.00041669	9.4062e-17	7.0206e-17
8	0.0069041	-0.010173	0.017872	-0.00079912	-5.6137e-16	3.8602e-16			8	0.0068337	-0.016406	0.022668	0.00056911	-4.0098e-16	-2.3856e-17
12	0.0094901	-0.0058143	0.016813	-0.0015119	-5.6794e-16	3.7105e-16			12	0.01017	-0.014016	0.022488	0.001697	-6.4884e-16	4.7118e-16
16	0.012183	-0.0074313	0.02147	-0.0018591	-4.7781e-16	3.7763e-16			16	0.01424	-0.013151	0.025298	0.0020916	-7.6772e-16	7.1905e-16
20	0.01522	-0.004929	0.022345	-0.0022	-4.7445e-16	2.8749e-16			20	0.018281	-0.003329	0.019352	0.0022565	-1.1473e-15	8.3793e-16
24	0.0181	0.0014842	0.019562	-0.0029504	-5.6064e-16	2.8413e-16			24	0.022231	-0.0001894	0.019597	0.002823	-9.6325e-16	1.2175e-15
28	0.02126	0.0051077	0.019562	-0.0034146	-1.5171e-16	3.7033e-16			28	0.026742	0.0013383	0.022052	0.0033527	-1.7832e-15	1.0335e-15
32	0.024497	0.0062029	0.021787	-0.0034987	-3.487e-16	-3.8608e-17			32	0.030728	0.0031452	0.023715	0.0038698	-1.432e-15	1.8534e-15
36	0.027738	0.0068067	0.024424	-0.0034977	-1.238e-16	1.5838e-16			36	0.034537	-0.002163	0.032276	0.0044255	-1.073e-15	1.5022e-15
40	0.030706	0.00958	0.025201	-0.0040804	-2.723e-16	-6.6516e-17			40	0.038033	-0.0014338	0.034906	0.0045636	-1.2684e-15	1.1432e-15
44	0.033794	0.016171	0.022343	-0.0047254	-3.0533e-16	8.1979e-17			44	0.041569	0.00509	0.031604	0.0048788	-1.1576e-15	1.3386e-15
48	0.036495	0.019927	0.022343	-0.0057808	-8.1401e-16	1.1502e-16			48	0.04455	0.002092	0.037646	0.0048168	-1.5993e-15	1.2278e-15
52	0.039953	0.023801	0.022362	-0.0062167	-5.33e-16	6.237e-16			52	0.047659	0.0075738	0.035826	0.0042654	-2.1262e-15	1.6695e-15
56	0.043125	0.024323	0.025367	-0.0065721	-1.1124e-15	3.4268e-16			56	0.050746	0.013595	0.033344	0.0038132	-2.3657e-15	2.1965e-15
60	0.04655	0.026793	0.026612	-0.0068638	-8.3902e-16	9.2213e-16			60	0.054138	0.013635	0.036911	0.0035948	-2.6697e-15	2.4359e-15
64	0.049969	0.026448	0.030285	-0.006775	-6.0522e-16	6.4871e-16			64	0.058269	0.0068582	0.049227	0.0021866	-2.6808e-15	2.7399e-15
68	0.053491	0.021129	0.039566	-0.0072133	-1.3296e-15	4.149e-16			68	0.061198	0.011859	0.049399	-5.6398e-05	-3.036e-15	2.751e-15
72	0.057367	0.025817	0.038178	-0.0066377	-1.5686e-15	1.1393e-15			72	0.065639	0.022321	0.044453	-0.0011317	-3.0018e-15	3.1063e-15
76	0.061728	0.031928	0.035233	-0.0054423	-1.2556e-15	1.3782e-15			76	0.069171	0.028937	0.043643	-0.0034009	-2.6073e-15	3.0721e-15
80	0.065242	0.03206	0.038362	-0.0051899	-9.1613e-16	1.0653e-15			80	0.072957	0.033649	0.044029	-0.0047123	-3.0053e-15	2.6776e-15
84	0.068289	0.034621	0.038712	-0.0050536	-1.0076e-15	7.2581e-16			84	0.076801	0.020661	0.061653	-0.0055016	-2.4362e-15	3.0755e-15
88	0.071154	0.038039	0.038471	-0.0053663	-7.7168e-16	8.1728e-16			88	0.08088	0.020184	0.067616	-0.0069046	-2.4647e-15	2.5064e-15
92	0.074273	0.041706	0.038052	-0.0054968	-6.5889e-16	5.8136e-16			92	0.084438	0.014851	0.077212	-0.0076095	-2.2954e-15	2.5349e-15
96	0.077014	0.043762	0.039447	-0.006206	1.8811e-17	4.6858e-16			96	0.087857	0.013618	0.082234	-0.0079778	-2.6139e-15	2.3656e-15
100	0.080169	0.045472	0.040866	-0.006179	1.0359e-17	-2.0913e-16			100	0.092122	0.0036453	0.096408	-0.0079131	-2.7432e-15	2.6841e-15
104	0.083718	0.044204	0.044987	-0.0054831	-1.4127e-16	-2.0068e-16			104	0.095708	0.003575	0.10024	-0.0080899	-2.8044e-15	2.8134e-15
108	0.086862	0.048759	0.043129	-0.0050372	-3.5228e-16	-4.9042e-17			108	0.09942	0.003722	0.1033	-0.0075806	-2.7836e-15	2.8747e-15
112	0.090238	0.045018	0.049606	-0.0043985	-7.6814e-16	1.6197e-16			112	0.1027	0.015541	0.096723	-0.0095433	-2.7694e-15	2.8538e-15
116	0.093658	0.045702	0.05191	-0.0039648	-7.4291e-16	5.7782e-16			116	0.10653	0.010989	0.1075	-0.011933	-3.0891e-15	2.8396e-15
120	0.096451	0.049094	0.051833	-0.0044862	-7.443e-16	5.526e-16			120	0.11163	0.014126	0.11105	-0.013528	-2.6878e-15	3.1593e-15
b)	cumulative shear xy								b)	cumulative shear xy
Time (min)	total shear	cell elongation	T1 transitions	correlation	cell division	cell death			Time (min)	total shear	cell elongation	T1 transitions	correlation	cell division	cell death
0	0	0	0	0	0	0			0	0	0	0	0	0	0
4	-0.00018952	-0.0022489	0.0024492	-0.00038735	1.3106e-16	7.5151e-17			4	-0.00038988	-0.007013	0.0073175	-0.00069492	5.1751e-16	4.5604e-17
8	-0.00023128	-0.0062936	0.00587	0.00019608	-9.3825e-17	-5.5913e-17			8	-0.0014126	-0.0097813	0.010485	-0.002116	4.7987e-16	-4.7191e-16
12	-0.00028564	-0.0080704	0.0070869	0.00070191	-2.09e-16	1.6898e-16			12	-0.0021276	-0.019442	0.020829	-0.0035143	5.6851e-16	-4.3427e-16
16	-0.00062016	-0.0099721	0.0082182	0.001137	-5.7816e-16	2.8415e-16			16	-0.0030223	-0.017598	0.02025	-0.0056726	6.792e-16	-5.229e-16
20	-0.00087498	-0.014066	0.011812	0.001382	-5.1927e-16	6.5331e-16			20	-0.0034047	-0.017814	0.021639	-0.0072284	1.2392e-15	-6.3359e-16
24	-0.0015245	-0.010853	0.0078893	0.0014425	-5.6822e-16	5.9442e-16			24	-0.0037371	-0.011531	0.017397	-0.0096006	1.7941e-15	-1.1936e-15
28	-0.0019014	-0.010785	0.0078893	0.0009974	-7.0971e-16	6.4337e-16			28	-0.0040932	-0.009516	0.01696	-0.011533	1.5688e-15	-1.7485e-15
32	-0.0020524	-0.00974	0.0076273	6.2936e-05	-7.5146e-16	7.8486e-16			32	-0.0044869	-0.0017029	0.010497	-0.013275	1.5525e-15	-1.5232e-15
36	-0.0016094	-0.0062703	0.0050126	-0.00034881	-7.0783e-16	8.2661e-16			36	-0.0046598	4.3736e-05	0.010277	-0.014974	1.5819e-15	-1.5069e-15
40	-0.0014838	-0.0057872	0.0054264	-0.0011209	-3.8703e-16	7.8298e-16			40	-0.0046962	0.0062465	0.0062217	-0.017158	1.6594e-15	-1.5363e-15
44	-0.0010427	-0.0070112	0.0071641	-0.0011941	-4.7882e-16	4.6218e-16			44	-0.0047686	0.012259	0.0034025	-0.020424	2.2965e-15	-1.6138e-15
48	-0.00086086	-0.006403	0.0071641	-0.0016205	-6.2365e-16	5.5397e-16			48	-0.0046516	0.017682	0.0014183	-0.023743	1.88e-15	-2.2509e-15
52	-0.00061846	-0.0074269	0.0085143	-0.0017044	-5.7095e-16	6.988e-16			52	-0.0041507	0.018517	0.0032254	-0.025884	1.6303e-15	-1.8344e-15
56	-0.00058382	-0.010926	0.011495	-0.001151	-4.9444e-16	6.461e-16			56	-0.0039641	0.011311	0.012553	-0.027817	1.0618e-15	-1.5847e-15
60	-0.00051626	-0.0082518	0.0082104	-0.00047127	-5.7477e-16	5.6959e-16			60	-0.0036876	0.015277	0.01119	-0.03014	8.6372e-16	-1.0162e-15
64	-0.00070223	-0.0071427	0.0070883	-0.00064384	-3.7499e-16	6.4992e-16			64	-0.003174	0.010359	0.017933	-0.031449	1.2515e-15	-8.1811e-16
68	-0.00087582	-0.012115	0.011974	-0.00073189	-4.0315e-16	4.5014e-16			68	-0.0022147	0.0043785	0.027367	-0.033941	1.1538e-15	-1.2059e-15
72	-0.00091282	-0.01825	0.018109	-0.00076768	-2.0533e-16	4.783e-16			72	-0.0012096	0.00084806	0.033438	-0.035473	8.4281e-16	-1.1082e-15
76	-0.00093916	-0.015615	0.015706	-0.0010241	-5.6723e-16	2.8048e-16			76	-0.00082587	0.0034535	0.033381	-0.037637	6.8068e-16	-7.9721e-16
80	-0.000789	-0.02199	0.022924	-0.0017175	-9.5149e-16	6.4238e-16			80	3.8891e-05	0.00026322	0.038826	-0.039027	3.6148e-16	-6.3507e-16
84	-0.00073847	-0.017382	0.01887	-0.0022206	-6.0571e-16	1.0266e-15			84	0.00074832	0.0053051	0.036607	-0.041142	8.9473e-16	-3.1588e-16
88	-0.00057179	-0.014164	0.015749	-0.0021487	-3.6897e-16	6.8086e-16			88	0.0012791	-0.0031581	0.047326	-0.042863	1.0725e-15	-8.4912e-16
92	-0.00098796	-0.01518	0.016413	-0.0022123	1.4586e-16	4.4412e-16			92	0.0010235	-0.0046206	0.051052	-0.04538	1.2902e-15	-1.0269e-15
96	-0.0011979	-0.015557	0.016951	-0.0025831	3.2959e-16	-7.0711e-17			96	0.00039308	-0.0017158	0.049534	-0.047394	1.1815e-15	-1.2446e-15
100	-0.00056598	-0.014466	0.01662	-0.0027101	1.8151e-16	-2.5444e-16			100	0.00058745	0.00033908	0.049121	-0.04884	8.856e-16	-1.1359e-15
104	0.00021797	-0.015614	0.018972	-0.0031317	4.4732e-16	-1.0636e-16			104	-4.6843e-05	0.0054673	0.045482	-0.050966	7.0043e-16	-8.4e-16
108	0.00030064	-0.014902	0.018316	-0.0031048	6.4702e-16	-3.7217e-16			108	-0.00045104	0.0048949	0.046994	-0.052311	3.5459e-16	-6.5483e-16
112	0.00043659	-0.0046258	0.0077994	-0.0027284	6.6728e-16	-5.7187e-16			112	4.8195e-05	-0.0049267	0.059135	-0.054131	1.0589e-15	-3.0899e-16
116	-7.1712e-05	0.00075322	0.0018047	-0.0026211	1.3502e-16	-5.9213e-16			116	-0.00050771	-0.0081953	0.063114	-0.055395	1.7458e-15	-1.0133e-15
120	1.03e-18	0.0068354	-0.0038485	-0.0029788	1.1077e-16	-5.9868e-17			120	2.2768e-18	-0.01127	0.067637	-0.056335	1.4482e-15	-1.7002e-15
c)	cumulative shear xx								c)	cumulative shear xx
Time (min)	total shear	cell elongation	T1 transitions	correlation	cell division	cell death			Time (min)	total shear	cell elongation	T1 transitions	correlation	cell division	cell death
0	0	0	0	0	0	0			0	0	0	0	0	0	0
4	0.0040953	0.0047687	0.00068461	-0.0013598	1.8573e-16	-2.3943e-16			4	0.0043078	0.0046517	0.00085432	-0.0011937	-1.185e-17	-7.1433e-17
8	0.0075795	0.0092945	0.00068461	-0.0024007	3.4615e-16	-4.2515e-16			8	0.0083877	0.011248	-0.00088468	-0.0019678	-1.3224e-16	-5.9583e-17
12	0.011818	0.015888	-0.00087598	-0.0031951	6.3431e-16	-5.8557e-16			12	0.012635	0.012349	0.0025771	-0.0022829	3.057e-16	6.0811e-17
16	0.01569	0.018375	0.00071809	-0.0034041	6.9088e-16	-8.7374e-16			16	0.01741	0.013827	0.006381	-0.0027878	7.8229e-16	-3.7713e-16
20	0.019648	0.022387	0.00071809	-0.0034577	1.2052e-15	-9.3031e-16			20	0.022112	0.017435	0.0073497	-0.002661	7.641e-16	-8.5373e-16
24	0.024346	0.02701	0.00071809	-0.003383	8.6695e-16	-1.4446e-15			24	0.02672	0.024545	0.0052219	-0.0030354	8.6536e-16	-8.3553e-16
28	0.028711	0.031517	0.00049514	-0.0033021	1.361e-15	-1.1064e-15			28	0.030938	0.031338	0.0040111	-0.004398	7.2038e-16	-9.368e-16
32	0.03296	0.037902	-0.0015343	-0.003408	1.1581e-15	-1.6005e-15			32	0.035646	0.038209	0.0021065	-0.0046573	5.0998e-16	-7.9182e-16
36	0.036866	0.043109	-0.0034539	-0.0027885	1.0624e-15	-1.3976e-15			36	0.040361	0.043508	0.0023187	-0.005453	7.6398e-16	-5.8142e-16
40	0.040802	0.047142	-0.0034539	-0.0028849	7.9922e-16	-1.3019e-15			40	0.044701	0.049622	0.0022464	-0.0071526	9.8977e-16	-8.3541e-16
44	0.044088	0.050877	-0.003366	-0.0034214	4.3058e-16	-1.0386e-15			44	0.049442	0.06036	-0.0012894	-0.0096116	7.4149e-16	-1.0612e-15
48	0.047579	0.055	-0.0035052	-0.0039147	2.5169e-16	-6.7001e-16			48	0.053933	0.069471	-0.0039636	-0.011557	8.403e-16	-8.1292e-16
52	0.051685	0.057078	-0.0015841	-0.0038074	7.4349e-16	-4.9112e-16			52	0.059013	0.075955	-0.003952	-0.01297	7.7022e-16	-9.1173e-16
56	0.055552	0.059357	0.00088874	-0.0046922	1.0211e-15	-9.8291e-16			56	0.063242	0.080435	-0.0025078	-0.014665	6.9924e-16	-8.4166e-16
60	0.059606	0.067184	-0.0017685	-0.0058066	8.1957e-16	-1.2605e-15			60	0.067491	0.094316	-0.0089237	-0.017881	8.2493e-16	-7.7068e-16
64	0.062852	0.069752	5.289e-05	-0.0069498	7.2585e-16	-1.059e-15			64	0.07153	0.10351	-0.010914	-0.021051	4.8522e-16	-8.9637e-16
68	0.066048	0.074242	5.289e-05	-0.008244	1.1771e-15	-9.6527e-16			68	0.076817	0.11412	-0.014186	-0.023089	4.9155e-16	-5.5665e-16
72	0.069149	0.073318	0.0051949	-0.0093593	9.2394e-16	-1.4166e-15			72	0.081891	0.11385	-0.0079599	-0.023979	9.112e-16	-5.6298e-16
76	0.072743	0.074002	0.0096722	-0.010929	5.5447e-16	-1.1634e-15			76	0.086039	0.11382	-0.0033269	-0.024428	7.8764e-16	-9.8264e-16
80	0.077075	0.080046	0.0085751	-0.011544	5.6991e-16	-7.9389e-16			80	0.090768	0.11949	-0.0039677	-0.024725	8.3169e-16	-8.5907e-16
84	0.081673	0.085583	0.0080844	-0.011992	1.0655e-15	-8.0934e-16			84	0.094964	0.1219	-0.0009512	-0.025955	5.6908e-16	-9.0312e-16
88	0.086081	0.093251	0.0052103	-0.012379	1.6124e-15	-1.3049e-15			88	0.099305	0.11782	0.0078292	-0.026311	5.6824e-16	-6.4051e-16
92	0.090194	0.10275	0.00067457	-0.013231	2.3693e-15	-1.8518e-15			92	0.10334	0.12054	0.011035	-0.0282	6.0715e-16	-6.3968e-16
96	0.094084	0.11146	-0.0036896	-0.013683	2.5976e-15	-2.6087e-15			96	0.10779	0.1271	0.010988	-0.030266	6.8055e-16	-6.7858e-16
100	0.098451	0.11594	-0.0043356	-0.013153	2.6569e-15	-2.8371e-15			100	0.11223	0.12978	0.013006	-0.030516	7.3211e-16	-7.5198e-16
104	0.10276	0.11778	-0.0021994	-0.012812	3.0151e-15	-2.8963e-15			104	0.11611	0.13607	0.011918	-0.031844	9.0265e-16	-8.0355e-16
108	0.10655	0.12149	-0.002802	-0.012135	3.8376e-15	-3.2545e-15			108	0.12032	0.14203	0.012135	-0.033809	1.0071e-15	-9.7409e-16
112	0.10966	0.11581	0.0063757	-0.012517	4.1269e-15	-4.077e-15			112	0.12499	0.14444	0.015246	-0.034646	1.2528e-15	-1.0786e-15
116	0.1136	0.11702	0.0097134	-0.013116	3.8806e-15	-4.3663e-15			116	0.12925	0.14825	0.016581	-0.035536	1.6726e-15	-1.3242e-15
120	0.11757	0.11961	0.011877	-0.013908	3.8096e-15	-4.12e-15			120	0.13326	0.15236	0.017507	-0.036556	2.2662e-15	-1.744e-15
c)	cumulative shear xy								c)	cumulative shear xy
Time (min)	total shear	cell elongation	T1 transitions	correlation	cell division	cell death			Time (min)	total shear	cell elongation	T1 transitions	correlation	cell division	cell death
0	0	0	0	0	0	0			0	0	0	0	0	0	0
4	-0.0002887	-0.0026669	0.001914	0.00046501	1.483e-16	3.3133e-16			4	-0.0011892	-0.0019522	0.0021166	-0.00135	9.8237e-17	-4.4721e-17
8	-0.00067247	-0.0035435	0.001914	0.00095874	-1.4287e-16	1.8303e-16			8	-0.0022737	-0.002893	0.0035932	-0.0029665	-4.6699e-16	-1.4296e-16
12	-0.00082405	-0.0062672	0.0037542	0.0016911	-7.2083e-17	4.742e-16			12	-0.0028399	0.0010126	0.0009169	-0.0047594	-5.027e-16	4.2227e-16
16	-0.0011627	-0.0043317	0.0019944	0.0011776	-5.2803e-16	4.0341e-16			16	-0.0031777	0.00078059	0.0022213	-0.0061688	-6.2871e-16	4.5798e-16
20	-0.0015516	-0.0046315	0.0019944	0.0010885	-6.6726e-16	8.5935e-16			20	-0.003178	0.0048084	-0.00025437	-0.0077198	-7.9783e-16	5.8399e-16
24	-0.001125	-0.0038538	0.0019944	0.00073711	-4.5938e-16	9.9859e-16			24	-0.0031395	0.010564	-0.0042973	-0.0093933	-3.29e-16	7.5311e-16
28	-0.00097416	-0.0048009	0.0031876	0.00064192	-9.9632e-16	7.907e-16			28	-0.0031481	0.013699	-0.0059052	-0.010928	-9.7787e-16	2.8428e-16
32	-0.00044506	-0.0052132	0.0040139	0.00075782	-8.2494e-16	1.3276e-15			32	-0.0034885	0.013395	-0.0036597	-0.013209	-6.2732e-16	9.3315e-16
36	-0.00016	-0.0058654	0.0047992	0.00091014	-6.9189e-16	1.1563e-15			36	-0.0034652	0.018323	-0.0062283	-0.015542	-3.7427e-16	5.826e-16
40	0.00012805	-0.0051168	0.0047992	0.00044955	1.3509e-16	1.0232e-15			40	-0.0031673	0.020845	-0.0059898	-0.018003	-4.786e-16	3.2955e-16
44	0.00088326	-0.0025916	0.0029122	0.00056635	9.2406e-17	1.9623e-16			44	-0.0028879	0.023617	-0.0055976	-0.020885	-3.9539e-17	4.3388e-16
48	0.0011108	0.001158	-0.00049674	0.00045304	2.3117e-16	2.3892e-16			48	-0.0025902	0.029607	-0.0083587	-0.023813	-1.2934e-16	-5.1824e-18
52	0.0014443	0.00040188	0.00041411	0.00063163	-9.4054e-17	1.0016e-16			52	-0.0018529	0.035136	-0.011246	-0.025716	4.5769e-16	8.4615e-17
56	0.0015472	-0.0017974	0.0023444	0.0010035	-3.4089e-16	4.2538e-16			56	-0.0014856	0.037878	-0.011225	-0.028111	6.2355e-16	-5.0241e-16
60	0.0016388	-0.006043	0.0062741	0.0014117	7.2339e-17	6.7222e-16			60	-0.0012695	0.038924	-0.0072063	-0.032957	5.4149e-16	-6.6827e-16
64	0.0014006	-0.0041703	0.004493	0.0010816	-2.3957e-16	2.5899e-16			64	-0.0003169	0.042415	-0.0070596	-0.035641	-7.5621e-17	-5.8621e-16
68	0.0010544	-0.0040532	0.004493	0.00061817	-6.6823e-16	5.709e-16			68	0.00073459	0.045046	-0.006556	-0.037727	5.0679e-17	3.09e-17
72	0.00055235	-0.0050372	0.0050914	0.00050204	-6.8122e-16	9.9955e-16			72	0.0012333	0.043131	-0.0017182	-0.04015	-2.2447e-16	-9.5401e-17
76	0.00013663	-0.00026781	0.00044226	-3.3097e-05	-1.1921e-15	1.0125e-15			76	0.0012648	0.046759	-0.0029091	-0.042554	-2.1792e-16	1.7975e-16
80	0.00011351	0.0036766	-0.0033643	-0.00019368	-1.0647e-15	1.5234e-15			80	0.0014836	0.047157	-0.0013676	-0.044275	-3.8675e-17	1.7319e-16
84	0.00022969	0.0033725	-0.0029749	-0.00016271	-8.9758e-16	1.396e-15			84	0.0011074	0.050627	-0.0036327	-0.045856	4.3388e-16	-6.0462e-18
88	0.00018467	0.0080791	-0.0070058	-0.00088118	-9.9882e-16	1.2289e-15			88	0.0014942	0.050257	-0.0015477	-0.047184	5.7693e-16	-4.786e-16
92	3.8041e-05	0.0091437	-0.0086004	-0.00049753	-1.2129e-15	1.3301e-15			92	0.0015782	0.056191	-0.0045955	-0.049988	4.8602e-16	-6.2165e-16
96	9.8984e-05	0.011302	-0.011007	-0.00018838	-1.1742e-15	1.5442e-15			96	0.0021308	0.065823	-0.011376	-0.052291	5.9668e-16	-5.3074e-16
100	-2.6732e-05	0.0088829	-0.0094372	0.00053659	-1.3771e-15	1.5055e-15			100	0.001625	0.069001	-0.013301	-0.054047	7.5838e-16	-6.4141e-16
104	-0.00020248	0.0060227	-0.0072728	0.0010569	-4.9785e-16	1.7084e-15			104	0.0012176	0.070481	-0.01394	-0.055295	1.0653e-15	-8.031e-16
108	-0.00043259	0.0066248	-0.0077346	0.00068652	-1.7117e-16	8.2917e-16			108	0.001778	0.072817	-0.013286	-0.057725	1.3855e-15	-1.1101e-15
112	-0.00057321	0.0075684	-0.0086942	0.00056118	-9.0909e-17	5.0249e-16			112	0.0013026	0.074085	-0.012746	-0.060007	1.5171e-15	-1.4303e-15
116	-2.311e-06	0.0031385	-0.0033695	0.0002375	-2.7773e-16	4.2223e-16			116	0.00043398	0.072635	-0.010927	-0.061244	1.1005e-15	-1.5618e-15
120	-1.6153e-18	0.0047663	-0.0038369	-0.00092198	-4.0193e-16	6.0906e-16			120	-1.1005e-17	0.074182	-0.011683	-0.062469	1.1243e-15	-1.1452e-15
d)	cumulative shear xx								d)	cumulative shear xx
Time (min)	total shear	cell elongation	T1 transitions	correlation	cell division	cell death			Time (min)	total shear	cell elongation	T1 transitions	correlation	cell division	cell death
0	0	0	0	0	0	0			0	0	0	0	0	0	0
4	0.0057729	0.0070725	0.00084495	-0.0021439	5.3135e-16	-7.6984e-17			4	0.0053097	0.0072534	0.00016467	-0.002102	-2.243e-16	-6.1769e-17
8	0.011186	0.018968	-0.0034077	-0.0043731	3.2887e-16	-6.0833e-16			8	0.010812	0.024809	-0.0090472	-0.0049374	-4.384e-16	1.6253e-16
12	0.016722	0.029956	-0.0069105	-0.0063227	3.8208e-16	-4.0586e-16			12	0.0164	0.031628	-0.0088608	-0.0063522	-4.6485e-16	3.7663e-16
16	0.022245	0.042449	-0.01206	-0.008142	5.1221e-16	-4.5906e-16			16	0.022838	0.039774	-0.0094046	-0.0075135	-3.5153e-16	4.0308e-16
20	0.027628	0.053807	-0.016109	-0.010066	6.2036e-16	-5.8919e-16			20	0.029151	0.054397	-0.015895	-0.0093319	-6.6382e-16	2.8976e-16
24	0.032954	0.063583	-0.019138	-0.011487	3.4517e-16	-6.9734e-16			24	0.034659	0.061564	-0.015456	-0.011429	-1.1022e-15	6.0205e-16
28	0.038242	0.075016	-0.023782	-0.012988	2.6113e-16	-4.2215e-16			28	0.040248	0.079976	-0.024911	-0.014794	-2.1817e-15	1.0404e-15
32	0.043415	0.081632	-0.023288	-0.014925	6.1744e-16	-3.3812e-16			32	0.045882	0.095073	-0.031914	-0.017253	-2.2497e-15	2.1199e-15
36	0.048344	0.091236	-0.025695	-0.01719	5.8511e-16	-6.9442e-16			36	0.051391	0.10707	-0.037407	-0.018245	-2.0736e-15	2.1879e-15
40	0.053692	0.094501	-0.022053	-0.018747	6.1459e-16	-6.6209e-16			40	0.057028	0.11493	-0.039598	-0.018284	-2.0936e-15	2.0118e-15
44	0.058929	0.10169	-0.02271	-0.020045	7.4978e-16	-6.9158e-16			44	0.062397	0.12099	-0.039543	-0.019026	-2.2747e-15	2.0318e-15
48	0.064084	0.1076	-0.022523	-0.020978	8.4061e-16	-8.2676e-16			48	0.068703	0.13154	-0.042966	-0.019848	-1.6261e-15	2.2129e-15
52	0.069443	0.11869	-0.026835	-0.022397	7.1245e-16	-9.1759e-16			52	0.074314	0.13585	-0.04026	-0.021244	-8.9072e-16	1.5644e-15
56	0.075167	0.12173	-0.023881	-0.022671	7.6503e-16	-7.8944e-16			56	0.080308	0.14221	-0.039396	-0.02248	-4.1706e-16	8.2895e-16
60	0.080095	0.13345	-0.028953	-0.024388	2.6721e-16	-8.4201e-16			60	0.087176	0.15656	-0.045691	-0.023663	-1.5409e-15	3.5529e-16
64	0.085541	0.14015	-0.029763	-0.02483	3.8484e-16	-3.442e-16			64	0.094045	0.16108	-0.043259	-0.02374	-1.5759e-15	1.4791e-15
68	0.09049	0.14582	-0.029793	-0.025526	5.3522e-17	-4.6183e-16			68	0.1018	0.1596	-0.032881	-0.024877	-1.5346e-15	1.5141e-15
72	0.095731	0.15041	-0.029793	-0.024874	1.1218e-16	-1.3051e-16			72	0.10917	0.17159	-0.036894	-0.025482	-1.7194e-15	1.4729e-15
76	0.1007	0.15598	-0.03037	-0.024891	3.2864e-16	-1.8916e-16			76	0.11642	0.18196	-0.040222	-0.025268	-1.5329e-15	1.6576e-15
80	0.10552	0.16436	-0.033598	-0.025227	-4.8821e-17	-4.0562e-16			80	0.12325	0.18772	-0.038691	-0.025736	-1.781e-15	1.4711e-15
84	0.10992	0.17172	-0.035191	-0.02659	-5.9723e-16	-2.8163e-17			84	0.13054	0.19928	-0.042171	-0.026519	-1.8131e-15	1.7192e-15
88	0.11477	0.18009	-0.03748	-0.027828	-9.3886e-16	5.2025e-16			88	0.13727	0.20794	-0.04362	-0.026999	-2.3754e-15	1.7514e-15
92	0.11954	0.18483	-0.035907	-0.029354	-6.5818e-16	8.6188e-16			92	0.14477	0.21679	-0.043319	-0.028658	-2.8111e-15	2.3137e-15
96	0.12422	0.19125	-0.036057	-0.030948	-3.3575e-16	5.812e-16			96	0.15026	0.22455	-0.043693	-0.030546	-3.5563e-15	2.7493e-15
100	0.1281	0.20334	-0.041984	-0.033231	-6.0699e-16	2.5876e-16			100	0.1555	0.23418	-0.046602	-0.032019	-3.0819e-15	3.4946e-15
104	0.13277	0.20563	-0.039566	-0.033278	-9.6853e-17	5.3e-16			104	0.16055	0.23776	-0.043335	-0.033817	-2.4636e-15	3.0201e-15
108	0.13954	0.21014	-0.038556	-0.03202	4.1747e-16	1.9868e-17			108	0.16624	0.24167	-0.040514	-0.034862	-2.2062e-15	2.4018e-15
112	0.1455	0.21495	-0.039352	-0.030081	1.1833e-15	-4.9445e-16			112	0.17129	0.24844	-0.040598	-0.036486	-2.771e-15	2.1444e-15
116	0.15153	0.21214	-0.032416	-0.02818	1.347e-15	-1.2603e-15			116	0.17637	0.25593	-0.041628	-0.037867	-3.5287e-15	2.7092e-15
120	0.15882	0.21995	-0.035418	-0.025692	9.1775e-16	-1.4239e-15			120	0.18182	0.26742	-0.044875	-0.040635	-2.9437e-15	3.4669e-15
d)	cumulative shear xy								d)	cumulative shear xy
Time (min)	total shear	cell elongation	T1 transitions	correlation	cell division	cell death			Time (min)	total shear	cell elongation	T1 transitions	correlation	cell division	cell death
0	0	0	0	0	0	0			0	0	0	0	0	0	0
4	-0.00021457	8.2946e-06	-0.00027418	5.0806e-05	1.6922e-16	2.7678e-16			4	-0.0011402	-0.00073159	0.0013645	-0.0017703	-2.1958e-17	-8.9066e-17
8	-0.00037044	-0.0012479	0.00095302	-7.6246e-05	-1.8795e-16	1.0755e-16			8	-0.0018746	0.00067422	0.0011327	-0.0036758	-2.8917e-16	-6.7108e-17
12	-0.00065102	0.0041674	-0.0027105	-0.0021069	-2.898e-16	4.6473e-16			12	-0.0027125	0.0022441	0.00034748	-0.0052972	-5.0602e-16	2.001e-16
16	-0.00024298	0.0057419	-0.003142	-0.0028404	-6.7103e-16	5.6658e-16			16	-0.0025678	0.01069	-0.0067751	-0.006474	-1.8673e-16	4.1695e-16
20	0.00010385	0.0064752	-0.0027373	-0.0036313	-7.9843e-16	9.4781e-16			20	-0.0022301	0.010907	-0.0061402	-0.0069886	2.1379e-16	9.7662e-17
24	0.00077925	0.010262	-0.0053018	-0.0041777	-6.9152e-16	1.0752e-15			24	-0.0025166	0.018999	-0.01205	-0.0094553	4.4537e-16	-3.0285e-16
28	0.0013871	0.013302	-0.0071449	-0.0047661	-7.2431e-16	9.683e-16			28	-0.0026346	0.029474	-0.019102	-0.012993	1.3294e-15	-5.3443e-16
32	0.0026505	0.013182	-0.0052388	-0.0052895	-9.2676e-16	1.0011e-15			32	-0.001531	0.029367	-0.015878	-0.015006	8.4628e-16	-1.4185e-15
36	0.0031188	0.014142	-0.0053248	-0.005695	-1.1273e-15	1.2035e-15			36	-0.00077958	0.029209	-0.013397	-0.016578	1.0425e-15	-9.3535e-16
40	0.0042508	0.013033	-0.0025922	-0.006187	-1.0516e-15	1.4041e-15			40	-0.00045989	0.029648	-0.011574	-0.018521	1.8442e-15	-1.1316e-15
44	0.004462	0.013685	-0.002589	-0.0066297	-1.2109e-15	1.3284e-15			44	0.00017978	0.034788	-0.013405	-0.021191	2.2909e-15	-1.9333e-15
48	0.0047351	0.010943	0.00018752	-0.0063922	-8.7979e-16	1.4877e-15			48	0.00067142	0.046264	-0.021999	-0.023582	2.445e-15	-2.38e-15
52	0.0055684	0.010467	0.00070836	-0.005608	-4.1185e-16	1.1566e-15			52	0.0010602	0.046506	-0.02096	-0.024476	2.2847e-15	-2.534e-15
56	0.0061097	0.012663	-0.00084209	-0.0057127	-5.4145e-16	6.8862e-16			56	0.0015984	0.051088	-0.023598	-0.02588	1.6129e-15	-2.3738e-15
60	0.0065631	0.011665	0.00087201	-0.0059759	-4.5723e-16	8.1822e-16			60	0.0020606	0.050935	-0.022134	-0.026732	1.7198e-15	-1.702e-15
64	0.0068773	0.011329	0.0018621	-0.0063173	-1.684e-16	7.3401e-16			64	0.0030414	0.051538	-0.02181	-0.026679	1.6382e-15	-1.8089e-15
68	0.0070467	0.0097072	0.0037046	-0.0063692	-8.7978e-17	4.4518e-16			68	0.0027228	0.057845	-0.027804	-0.027309	2.1139e-15	-1.7272e-15
72	0.0068638	0.0095145	0.0037046	-0.0063596	4.95e-17	3.6476e-16			72	0.0022441	0.063285	-0.03276	-0.028273	2.574e-15	-2.203e-15
76	0.0065909	0.0037034	0.0091187	-0.0062362	-1.9835e-16	2.2728e-16			76	0.002263	0.061833	-0.031243	-0.028322	2.316e-15	-2.663e-15
80	0.0059495	0.0052308	0.0068219	-0.0061074	2.9436e-16	4.7513e-16			80	0.0022339	0.059846	-0.029347	-0.028262	2.1718e-15	-2.405e-15
84	0.0052121	0.0033245	0.0089135	-0.0070308	5.9489e-16	-1.7578e-17			84	0.0026867	0.060179	-0.029416	-0.028074	1.8713e-15	-2.2609e-15
88	0.0047451	-0.00012932	0.012472	-0.0076021	2.2266e-16	-3.1811e-16			88	0.0031625	0.062508	-0.03066	-0.028686	2.6554e-15	-1.9604e-15
92	0.0040294	0.0022567	0.010094	-0.0083256	3.5682e-16	5.4115e-17			92	0.0036553	0.059731	-0.027626	-0.02845	2.9813e-15	-2.7445e-15
96	0.0030159	-0.00041541	0.011948	-0.0085195	-1.1382e-16	-8.0041e-17			96	0.0033308	0.052816	-0.020066	-0.02942	2.5521e-15	-3.0704e-15
100	0.0027465	-0.0054039	0.017098	-0.0089502	1.6652e-16	3.9059e-16			100	0.0030164	0.055837	-0.02269	-0.030132	2.0858e-15	-2.6412e-15
104	0.0020536	-0.0016844	0.013225	-0.0094902	6.234e-16	1.1026e-16			104	0.0014959	0.066122	-0.033384	-0.031246	1.9327e-15	-2.1748e-15
108	0.0014538	0.0012654	0.010069	-0.0098841	1.2641e-15	-3.4662e-16			108	0.0014983	0.069388	-0.035777	-0.032121	1.8347e-15	-2.0218e-15
112	0.0015585	-0.0026645	0.014268	-0.010047	7.5995e-16	-9.8733e-16			112	0.00090735	0.07071	-0.037384	-0.032428	2.2113e-15	-1.9238e-15
116	0.00094843	-0.00049705	0.011701	-0.010256	6.2956e-16	-4.8317e-16			116	0.00086645	0.074731	-0.041421	-0.032454	2.6606e-15	-2.3004e-15
120	1.5179e-18	0.0010849	0.0095512	-0.010636	1.2883e-15	-3.5278e-16			120	1.6805e-17	0.072898	-0.039655	-0.033239	2.6279e-15	-2.7496e-15
