# Supplementary material for: Epithelial colonies in vitro elongate through collective effects
Source: eLife. 2021 Jan 4;10:e57730. doi: 10.7554/eLife.57730 (PMC7850623; doi:10.7554/eLife.57730)
Supplement: Figure 8—figure supplement 1—source data 1. [file elife-57730-fig8-figsupp1-data1.xlsx]

## Sheet: Figure 8-figure supplement 1b
Stretching
Cell line	Strain			Cell line	Strain			Cell line	Strain			Cell line	Strain			Cell line	Strain			Cell line	Strain			Cell line	Strain			Cell line	Strain
MDCK	EcadhGFP			MDCK	EcadhGFP			MDCK	EcadhGFP			MDCK	EcadhGFP			MDCK	EcadhGFP			MDCK	EcadhGFP			MDCK	EcadhGFP			MDCK	EcadhGFP
Experiment	Colony			Experiment	Colony			Experiment	Colony			Experiment	Colony			Experiment	Colony			Experiment	Colony			Experiment	Colony			Experiment	Colony
1	1			1	2			1	3			2	4			2	5			2	6			3	7			3	8
Time (min)	Qxx(t)-Qxx(0)	Qxy(t)-Qxy(0)		Time (min)	Qxx(t)-Qxx(0)	Qxy(t)-Qxy(0)		Time (min)	Qxx(t)-Qxx(0)	Qxy(t)-Qxy(0)		Time (min)	Qxx(t)-Qxx(0)	Qxy(t)-Qxy(0)		Time (min)	Qxx(t)-Qxx(0)	Qxy(t)-Qxy(0)		Time (min)	Qxx(t)-Qxx(0)	Qxy(t)-Qxy(0)		Time (min)	Qxx(t)-Qxx(0)	Qxy(t)-Qxy(0)		Time (min)	Qxx(t)-Qxx(0)	Qxy(t)-Qxy(0)
0	0	0		0	0	0		0	0	0		0	0	0		0	0	0		0	0	0		0	0	0		0	0	0
30	-0.00157596	0.0349834		30	0.0296234	-0.0314386		30	0.0138861	0.0187539		30	-0.014463	0.0259181		30	-0.0186832	0.00401455		30	0.0225079	0.0261374		30	0.0142139	-0.00919364		30	0.023447	-0.00455184
60	0.011322	0.064853		60	0.0218734	-0.0600401		60	0.0370732	0.00726051		60	-0.0470911	0.0391763		60	-0.0373481	-0.0410624		60	0.0356602	0.0807772		60	0.00441107	-0.00399596		60	0.0292244	0.00355575
90	0.0483376	0.0796947		90	0.0250022	-0.0700924		90	0.0276216	-0.00301559		90	-0.0551464	0.0374318		90	-0.05388	-0.0460835		90	0.0432367	0.122192		90	0.00883885	-0.00818997		90	0.0380793	-0.001505
120	0.0410013	0.0910667		120	0.0210483	-0.0624539		120	0.0206083	0.00553135		120	-0.048772	0.0197868		120	-0.062051	-0.0322348		120	0.0642133	0.126093		120	0.018954	-0.00679562		120	0.0462511	0.00102277

## Sheet: Figure 8-figure supplement 1c
Control
Cell line	Strain			Cell line	Strain			Cell line	Strain			Cell line	Strain			Cell line	Strain			Cell line	Strain			Cell line	Strain			Cell line	Strain			Cell line	Strain			Cell line	Strain			Cell line	Strain			Cell line	Strain
MDCK	EcadhGFP			MDCK	EcadhGFP			MDCK	EcadhGFP			MDCK	EcadhGFP			MDCK	EcadhGFP			MDCK	EcadhGFP			MDCK	EcadhGFP			MDCK	EcadhGFP			MDCK	EcadhGFP			MDCK	EcadhGFP			MDCK	EcadhGFP			MDCK	EcadhGFP
Experiment	Colony			Experiment	Colony			Experiment	Colony			Experiment	Colony			Experiment	Colony			Experiment	Colony			Experiment	Colony			Experiment	Colony			Experiment	Colony			Experiment	Colony			Experiment	Colony			Experiment	Colony
1	1			1	2			1	3			1	4			1	5			1	6			2	7			3	8			3	9			3	10			3	11			3	12
Time (min)	Qxx(t)-Qxx(0)	Qxy(t)-Qxy(0)		Time (min)	Qxx(t)-Qxx(0)	Qxy(t)-Qxy(0)		Time (min)	Qxx(t)-Qxx(0)	Qxy(t)-Qxy(0)		Time (min)	Qxx(t)-Qxx(0)	Qxy(t)-Qxy(0)		Time (min)	Qxx(t)-Qxx(0)	Qxy(t)-Qxy(0)		Time (min)	Qxx(t)-Qxx(0)	Qxy(t)-Qxy(0)		Time (min)	Qxx(t)-Qxx(0)	Qxy(t)-Qxy(0)		Time (min)	Qxx(t)-Qxx(0)	Qxy(t)-Qxy(0)		Time (min)	Qxx(t)-Qxx(0)	Qxy(t)-Qxy(0)		Time (min)	Qxx(t)-Qxx(0)	Qxy(t)-Qxy(0)		Time (min)	Qxx(t)-Qxx(0)	Qxy(t)-Qxy(0)		Time (min)	Qxx(t)-Qxx(0)	Qxy(t)-Qxy(0)
0	0	0		0	0	0		0	0	0		0	0	0		0	0	0		0	0	0		0	0	0		0	0	0		0	0	0		0	0	0		0	0	0		0	0	0
10	0.0117352	0.00616919		10	-0.0100545	-0.0120623		10	0.00580209	-0.00316831		10	0.00888705	0.0256976		10	0.0182121	0.00412761		10	0.00175192	0.000859062		10	0.0052455	-0.00419516		10	0.000650003	0.00556281		10	0.00250364	-0.00918657		10	0.0021667	0.0109627		10	-0.00705993	0.000230585		10	0.00129729	-0.00863979
20	0.0203559	-0.00818975		20	-0.0171037	-0.0209375		20	0.00627992	0.00429284		20	0.0235712	0.0250228		20	0.0361108	-0.0149337		20	-0.00382035	-0.0172634		20	0.00962361	0.00694938		20	-0.00495154	0.0062581		20	0.000660822	-0.0122087		20	0.00672261	0.0122497		20	0.00143457	-0.0057114		20	-0.0093099	-0.00698632
30	0.0392744	0.0103807		30	-0.0171477	-0.0136484		30	0.00288522	0.00664998		30	0.0117089	0.0210803		30	0.0394971	0.000428148		30	-0.0019108	-0.0120255		30	0.0132658	0.00534332		30	0.00886993	-0.030422		30	8.35149e-05	-0.0185274		30	0.00630858	0.0200967		30	-0.0119627	-0.000421053		30	0.00811622	0.0131991
40	0.0562014	-0.000720659		40	-0.00877221	-0.010818		40	0.00702354	-0.00575928		40	0.00855912	0.0143629		40	0.0293712	-0.0014183		40	4.63385e-05	-0.00369596		40	0.00246424	-0.0197921		40	0.00150327	-0.0425728		40	0.0140332	-0.00994939		40	0.0369319	0.0129999		40	0.00312616	-0.00363976		40	0.015963	0.0085366
50	0.0601873	0.00976232		50	-0.0128677	-0.0188679		50	0.00980507	-0.000426349		50	-0.00518686	0.00723962		50	0.0181642	-0.0159089		50	-0.00394625	-0.0130332		50	0.00594381	-0.0178888		50	-0.000503721	-0.0499673		50	0.0255226	-0.0130984		50	0.0452698	0.00474512		50	0.00912857	-0.00124884		50	0.0277327	0.00819113
60	0.0710887	0.0191062		60	-0.0143048	-0.0173489		60	0.0381514	-0.00148432		60	-0.00091437	0.000813699		60	0.0160293	-0.0174552		60	0.00547349	-0.00447712		60	0.01032	-0.0253837		60	-0.00597988	-0.042902		60	0.0202525	-0.0133384		60	0.0562381	0.0102463		60	0.0138323	0.00345527		60	0.0214526	0.0103191
70	0.0750829	0.016849		70	-0.00465063	-0.0139702		70	0.030359	-0.0193883		70	0.00111232	0.010587		70	0.0216784	-0.0113163		70	0.0149542	-0.0220252		70	0.0433827	-0.00150225		70	0.00919802	-0.0306753		70	0.0227307	0.00193628		70	0.0657939	0.00574818		70	0.0137469	0.0106711		70	0.0334632	0.00198336
80	0.0786893	0.0225651		80	-0.00661293	-0.00746965		80	0.0322257	-0.00920718		80	0.00967383	0.00249936		80	0.0279015	-0.0103508		80	0.0208057	-0.00731186		80	0.0492203	0.0229904		80	0.0131177	-0.035264		80	0.016287	0.00599387		80	0.0745906	0.0050671		80	0.0154786	0.0106937		80	0.0204381	0.00693431
90	0.0814725	0.0194666		90	0.00642334	-0.00841184		90	0.0248842	-0.0100681		90	0.0182714	-0.0119784		90	0.022009	-0.0225051		90	0.0367742	-0.00783708		90	0.0383649	0.00701669		90	0.0263389	-0.036907		90	0.0356884	0.00332002		90	0.0756101	-0.00386391		90	0.0276269	0.0141178		90	0.0333519	0.00099332
100	0.0809087	0.0135788		100	0.0065386	-0.00646233		100	0.0236639	-0.0341007		100	0.0105828	-0.0105843		100	0.025142	-0.0156808		100	0.0382369	-0.00729977		100	0.0461785	0.00822274		100	0.0355004	-0.0253644		100	0.0238738	-0.000534125		100	0.0901869	0.000107624		100	0.0265213	0.0181431		100	0.0353984	0.00650873
110	0.0701217	0.0122891		110	0.0243823	0.00131071		110	0.0154148	-0.0138465		110	-0.00105942	-0.0162863		110	0.0351472	-0.0126788		110	0.0225523	-0.018889		110	0.0474122	-0.00204626		110	0.0321304	-0.0231521		110	0.0462182	0.00557732		110	0.104442	-0.00210283		110	0.0351173	0.0192246		110	0.0339715	0.000774513
120	0.0700268	0.0258426		120	0.0204392	-2.55855e-05		120	0.0135016	-0.0119253		120	0.00802485	-0.0112821		120	0.0442656	-0.0150725		120	0.0247011	-0.0174695		120	0.0451417	-0.00452086		120	0.0358596	-0.0219349		120	0.0506524	0.00427162		120	0.113843	-0.00732689		120	0.0397459	0.0169939		120	0.0425448	0.00724497
Stretching
Cell line	Strain			Cell line	Strain			Cell line	Strain			Cell line	Strain			Cell line	Strain			Cell line	Strain			Cell line	Strain			Cell line	Strain
MDCK	EcadhGFP			MDCK	EcadhGFP			MDCK	EcadhGFP			MDCK	EcadhGFP			MDCK	EcadhGFP			MDCK	EcadhGFP			MDCK	EcadhGFP			MDCK	EcadhGFP
Experiment	Colony			Experiment	Colony			Experiment	Colony			Experiment	Colony			Experiment	Colony			Experiment	Colony			Experiment	Colony			Experiment	Colony
1	1			1	2			1	3			2	4			2	5			2	6			3	7			3	8
Time (min)	Qxx(t)-Qxx(0)	Qxy(t)-Qxy(0)		Time (min)	Qxx(t)-Qxx(0)	Qxy(t)-Qxy(0)		Time (min)	Qxx(t)-Qxx(0)	Qxy(t)-Qxy(0)		Time (min)	Qxx(t)-Qxx(0)	Qxy(t)-Qxy(0)		Time (min)	Qxx(t)-Qxx(0)	Qxy(t)-Qxy(0)		Time (min)	Qxx(t)-Qxx(0)	Qxy(t)-Qxy(0)		Time (min)	Qxx(t)-Qxx(0)	Qxy(t)-Qxy(0)		Time (min)	Qxx(t)-Qxx(0)	Qxy(t)-Qxy(0)
0	0	0		0	0	0		0	0	0		0	0	0		0	0	0		0	0	0		0	0	0		0	0	0
30	-0.0148635	0.031708		30	0.0431813	0.00114378		30	0.0100776	0.021047		30	0.0267152	-0.0129315		30	0.0129484	-0.0140541		30	0.0331374	-0.00957525		30	0.0106534	-0.0131554		30	0.0207791	-0.0117775
60	-0.0143984	0.0642401		60	0.059346	-0.0236919		60	0.0350235	0.0141595		60	0.0610461	-0.0050725		60	0.0541923	0.0120083		60	0.0882898	0.00122709		60	0.00295098	-0.00516885		60	0.0288365	-0.00593024
90	0.0141024	0.0921352		90	0.0689268	-0.0280562		90	0.0276922	0.00227739		90	0.0666431	0.000977623		90	0.0705939	0.00657654		90	0.129097	0.01159		90	0.0058563	-0.0105311		90	0.0356202	-0.013546
120	0.0029678	0.0998271		120	0.0605963	-0.0259154		120	0.0191853	0.00933922		120	0.0512993	0.0117732		120	0.0692828	-0.00944948		120	0.141381	-0.00585553		120	0.015904	-0.012349		120	0.0441716	-0.0137505
