# Supplementary material for: Epithelial colonies in vitro elongate through collective effects
Source: eLife. 2021 Jan 4;10:e57730. doi: 10.7554/eLife.57730 (PMC7850623; doi:10.7554/eLife.57730)
Supplement: Figure 8—source data 1. [file elife-57730-fig8-data1.xlsx]

## Sheet: Figure 8
Stretching
Cell Line	Strain
MDCK	GFP-Ecadherin
Experiment	Colony
1	1
Time (min)	Total Shear	Cell Elongation	T1	Correlation Effects	Extrusion	Division
0	0	0	0	0	0	0
30	0.024	0.019	0.015	-0.011	0	0
60	0.041	0.036	0.019	-0.016	0.001	0
90	0.049	0.068	0.007	-0.028	0.001	0
120	0.056	0.074	0.008	-0.027	0.001	0
Cell Line	Strain
MDCK	GFP-Ecadherin
Experiment	Colony
2	2
Time (min)	Total Shear	Cell Elongation	T1	Correlation Effects	Extrusion	Division
0	0	0	0	0	0	0
30	0.025	0.03	0.003	-0.007	0	0
60	0.056	0.048	0.019	-0.011	0	0
90	0.082	0.064	0.017	0.001	0	0
120	0.08	0.072	0.002	0.006	0	0
Cell Line	Strain
MDCK	GFP-Ecadherin
Experiment	Colony
3	3
Time (min)	Total Shear	Cell Elongation	T1	Correlation Effects	Extrusion	Division
0	0	0	0	0	0	0
30	0.003	0.03	-0.018	-0.005	-0.001	-0.003
60	0.015	-0.002	0.027	-0.008	-0.001	-0.001
90	0.018	-0.01	0.031	-0.001	0	-0.001
120	0.024	-0.013	0.035	0.003	0	-0.001
